## **The mRNA export adaptor Yra1 contributes to DNA double-strand break repair through its C-box domain**

\*Valentina Infantino, \*Evelina Tutucci<sup>‡</sup>, Noël Yeh Martin<sup>•</sup>, Audrey Zihlmann, Varinia García-Molinero, Géraldine Silvano, Benoit Palancade<sup>#</sup>, and Françoise Stutz<sup>+</sup>.

Dept. of Cell Biology, 30 Quai E. Ansermet, University of Geneva, 1211 Geneva, Switzerland.

<sup>‡</sup> Department of Anatomy and Structural Biology, Albert Einstein College of Medicine, Bronx, NY 10461, USA

<sup>•</sup> Centre for Integrative Biology (CIBIO), University of Trento, Via Sommarive 9, 38123 Povo (TN), Italy.

<sup>#</sup> Institut Jacques Monod, CNRS, UMR 7592, Univ Paris Diderot, Sorbonne Paris Cité, 15 rue Hélène Brion, 75013 Paris, France.

\*Equal contribution

+ Corresponding author: [Francoise.Stutz@unige.ch](mailto:Francoise.Stutz@unige.ch)

1 **ABSTRACT (168 words)**

2

3 Yra1 is an mRNA export adaptor involved in mRNA biogenesis and  
4 export in *S. cerevisiae*. Yra1 overexpression was recently shown to promote  
5 accumulation of DNA:RNA hybrids favoring DNA double strand breaks (DSB),  
6 cell senescence and telomere shortening, via an unknown mechanism. Yra1  
7 was also identified at an HO-induced DSB and Yra1 depletion causes defects  
8 in DSB repair. Previous work from our laboratory showed that Yra1  
9 ubiquitination by Tom1 is important for mRNA export. Interestingly, we found  
10 that Yra1 is also ubiquitinated by the SUMO-targeted ubiquitin ligases Slx5-  
11 Slx8 implicated in the interaction of irreparable DSB with nuclear pores. Here  
12 we show that Yra1 binds an HO-induced irreparable DSB. Importantly, a Yra1  
13 mutant lacking the evolutionarily conserved C-box is not recruited to an HO-  
14 induced irreparable DSB and becomes lethal under DSB induction in a HO-  
15 cut reparable system. Together, the data provide evidence that Yra1 plays a  
16 crucial role in DSB repair via homologous recombination. Unexpectedly, while  
17 the Yra1 C-box is essential, Yra1 sumoylation and/or ubiquitination are  
18 dispensable in this process.

19

20

21 Keywords: Yra1, HO endonuclease cut, genome instability, DSB repair,  
22 homologous recombination.

## 24 INTRODUCTION

25

26 Yra1 (Yeast RNA annealing protein 1) is an essential protein in *S.*  
27 *cerevisiae*, well characterized as an mRNA export adaptor involved in  
28 transcription elongation, 3' processing, and finally mRNA export together with  
29 the Mex67/Mtr2 export receptor and the poly(A) binding protein Nab2 (1).

30 Yra1 is evolutionarily conserved from yeast to human and belongs to  
31 the RNA and Export Factor (REF) family of hnRNP-like proteins (2-5). REF  
32 proteins include a conserved domain organization with a central RNP-motif  
33 containing an RNA binding domain (RBD) and two highly conserved N- and  
34 C-terminal boxes (N-box and C-box). These domains are separated by two  
35 variable regions (N-var and C-var), rich in positively charged amino acids that  
36 mediate interaction with RNAs and Mex67 (3, 6). *yra1* mutants lacking the  
37 RBD, the N-terminal or C-terminal (N-box+N-var or C-box+C-var) regions are  
38 viable indicating functional redundancy in their RNA binding properties.  
39 However, at least one highly conserved N-box or C-box is required for viability  
40 as deletion of both is lethal (7).

41 While Mex67 and Nab2 are shuttling between the nucleus and  
42 cytoplasm, Yra1 is a strictly nuclear protein (3, 5). Nuclear localization of Yra1  
43 is important for mRNA export as mutants lacking the N-terminal nuclear  
44 localization signal (NLS) demonstrate nuclear accumulation of poly(A)+ RNA  
45 when examined by fluorescent *in situ* hybridization (FISH) (7). Yra1 binding to  
46 mRNA is important as well, as *yra1* mutants lacking the N- or C-terminal  
47 variable RNA binding domains also present poly(A)+ RNA export defects.

48 Interestingly, *yra1* mutants lacking the RBD also show some poly(A)<sup>+</sup> RNA  
49 export defect although this domain is not implicated in Mex67 interaction nor  
50 RNA binding *in vitro*, suggesting that it may contribute to Yra1 function by  
51 ensuring optimal folding of the protein. Loss of the highly conserved Yra1 C-  
52 box (*yra1*(1-210) mutant) does not cause an obvious poly(A)<sup>+</sup> mRNA export  
53 defect, but it is required for optimal growth (7). This observation is consistent  
54 with the fact that the C-box does not play a major role in Mex67 or RNA  
55 binding and suggests that this highly conserved 16 amino acids sequence  
56 may be important for another aspect of Yra1 function.

57 Different layers of regulations have been shown to modulate Yra1 levels  
58 and function in mRNA biogenesis. We have previously shown that Yra1  
59 ubiquitination by the E3 ligase Tom1 displaces Yra1 from messenger  
60 ribonucleoparticles (mRNPs) as a quality control signal for correctly processed  
61 mRNP prior to export into the cytoplasm (8). Another important feature for Yra1  
62 regulation is that the *YRA1* gene harbors the second largest intron (776 nt) in  
63 the *S. cerevisiae* genome, containing a non-canonical branchpoint sequence  
64 (BS, gACUAAC) after a long first exon (300 nt). An excess of Yra1 protein  
65 prevents *YRA1* pre-mRNA splicing and promotes export of the unspliced  
66 transcript into the cytoplasm where it is degraded by the 5' to 3' decay pathway  
67 (4, 9). It has been reported previously that the *yra1* $\Delta$ *intron* mutant shows Yra1  
68 protein overexpression (7) that is toxic for cell growth (10, 11) and impairs  
69 poly(A)<sup>+</sup> RNA export (12, 13). The presence of the *YRA1* intron is important to  
70 maintain optimal Yra1 protein levels through Yra1 auto-regulation at the level  
71 of splicing in a negative feedback mechanism (4). Studies on the *YRA1* gene  
72 revealed that a mutation restoring a canonical branch-point sequence in the

73 context of the C-terminal mutation *yra1-F223S* or the C-terminal deletion *yra1-*  
74  $\Delta C11$  is not viable. Overall, these mutagenesis experiments indicated that at  
75 least three elements contribute to optimal Yra1 autoregulation: a long first  
76 exon, a long intron, a weak branchpoint and an intact C-terminal domain (4).  
77 The C-terminal domain was proposed to negatively regulate splicing provided  
78 that splicing efficiency was suboptimal.

79 Independent studies have also indicated that besides its function in  
80 mRNA biogenesis and export, Yra1 could contribute to DNA metabolism. It was  
81 initially proposed that Yra1 interacts with a subunit of the DNA polymerase  $\delta$   
82 and Dia2, an E3 ubiquitin ligase involved in DNA replication, genome stability  
83 and S phase checkpoint recovery (14, 15). The C-box domain of Yra1 was  
84 suggested to be necessary for the recruitment of Dia2 at replication origins  
85 (15), establishing a potential functional link between Yra1 and DNA  
86 metabolism. Another report provided evidence that strong Yra1 overexpression  
87 causes transcription-associated hyper-recombination, a cell senescence-like  
88 phenotype and telomere shortening, probably by counteracting telomere  
89 replication since overexpressed Yra1 was located at the Y telomeric regions by  
90 ChIP-chip. In the proposed model, Yra1 overexpression stabilizes R-loops,  
91 which contain DNA:RNA hybrids and displaced DNA strands, favoring conflicts  
92 between the replication fork and RNA Pol II resulting in genome instability (16,  
93 17). Finally, a recent study based on ChAP-MS (chromatin affinity purification  
94 with mass spectrometry) identified Yra1 in association with a reparable double-  
95 strand break (DSB); moreover, a *yra1* DAmP (Decreased Abundance by mRNA  
96 Perturbation) hypomorph mutant showed sensitivity to DSB agents and global  
97 defects in DSB repair by pulse field gel electrophoresis (18).

98 DSBs can be repaired by two independent pathways: non-homologous  
99 end joining (NHEJ) that joins the DNA ends of the lesion in an error-prone  
100 process, and homologous recombination (HR), an error-free pathway used  
101 when homologous DNA sequences are available for the repair (19). The genetic  
102 instability resulting from unrepaired DSBs leads to cell death (20). The HR  
103 process has to be tightly regulated to avoid aberrant genomic rearrangements.  
104 On site sumoylation of HR proteins induced under DNA damage is pivotal to  
105 ensure efficient and optimal DSB repair (21-24). SUMO-targeted E3 ubiquitin  
106 ligases (STUbL), such as the Slx5-Slx8 complex in yeast, have also been  
107 shown to contribute to the maintenance of genome stability, although their  
108 targets have not been systematically identified (25).

109 In this work, we show that Yra1 is sumoylated by the SUMO ligases Siz1  
110 and Siz2, desumoylated by the SUMO protease Ulp1 and ubiquitinated by the  
111 SUMO-dependent E3 ligases Slx5-Slx8, which are important for genome  
112 integrity (25, 26). Importantly, we find that Yra1 is recruited to DSBs and identify  
113 the Yra1 C-box domain to be crucial for the binding and repair; however, Yra1  
114 ubiquitination and/or sumoylation are not required in this process. Our results  
115 strengthen the importance of Yra1 in genome integrity and provide evidence for  
116 a critical role of Yra1 in DSB repair.

117

## 118 MATERIALS AND METHODS

### 119 Yeast strains and plasmids

120 The strains and plasmids used in this study are listed in Supplementary  
121 Tables 1 and 2 (S1 and S2 Table). Primers are listed in Supplementary Table  
122 3 (S3 Table).

123 The *YRA1* shuffled strains were obtained by transformation of the *YRA1*  
124 shuffle strain (*yra1::HIS3*, YCpLac33-URA3-*YRA1*WT, Cen) with YCpLac22-  
125 TRP centromeric plasmids encoding wild-type HA-tagged Yra1. The  
126 transformed strains were plated on 5-FOA to select against the WT *YRA1*  
127 URA3 plasmid. The cells able to grow on 5-FOA contain only the YCplac22-  
128 TRP1-HA-*YRA1* WT plasmid (*YRA1* shuffled background). Single clones were  
129 analyzed for correct auxotrophic markers and checked for HA-Yra1  
130 expression by Western blot with  $\alpha$ HA antibodies.

131 The strains with integrated WT or mutant *HA-YRA1* were obtained by  
132 transformation of the W303 Mat-*a*/ $\alpha$  diploid strain or FSY5073 (GA-6844 HO  
133 irreparable system (27)) with a fragment containing the HA-tagged wild-type  
134 or mutant *YRA1* sequences obtained by SmaI digestion of an engineered  
135 pUC18 construct. The pUC18 plasmids were obtained by Gibson assembly  
136 and contain a SmaI fragment consisting of the HA-tagged wild-type or mutant  
137 *YRA1* sequences preceded by the *YRA1* promoter and followed by the *YRA1*  
138 3' UTR, a selective marker (URA3 or HIS3) and an additional 100 pb of *YRA1*  
139 3' downstream sequences. Yeast transformants were plated on the relevant  
140 selective medium. Correct recombination and integration into the endogenous  
141 *YRA1* locus was checked by PCR with a forward primer complementary to a  
142 sequence -600bp upstream of the *YRA1* locus (OFS3118), not present in the

143 plasmid sequence, and a reverse primer matching the HA-tag sequence  
144 present only in the plasmid-derived sequence (OFS3120). The W303 diploid  
145 strains containing the integrated *HA-YRA1 WT* or *HA-yra1* mutant sequences  
146 were sporulated on K-acetate agar plates for 3 days at 25°C and dissected.  
147 Single spores were analyzed for relevant auxotrophic markers; *HA-YRA1*  
148 integration was confirmed by PCR as described above and expression of *HA-*  
149 *Yra1* proteins was verified by Western blot.

150 The deletion strains were generated by homologous recombination of a  
151 cassette containing an auxotrophic marker flanked by sequences adjacent to  
152 the gene to delete. The pUG73::*LEU2*, pAG25::*natMX4* or pUG6::*kanMX6*  
153 cassettes were amplified by PCR using 80 nucleotides long forward and  
154 reverse primers (20 nt complementary to the plasmid and 60 nt  
155 complementary to the target sequences). PCR products were transformed  
156 into the *YRA1* shuffle or WT W303 Mat-a/ $\alpha$  diploid strains and correct  
157 insertion confirmed by PCR. The W303 Mat-a/ $\alpha$  diploid strains containing the  
158 gene deletion were sporulated and single spores analyzed for auxotrophic  
159 markers. Haploid Mat- $\alpha$  WT W303 deletion mutants were crossed with haploid  
160 Mat-a strains containing integrated *HA-YRA1 WT* or mutant sequences  
161 obtained as described above. The diploid *yra1* double mutants were  
162 sporulated to obtain haploid *yra1* double mutants in W303 background. In the  
163 case of deletions in the *YRA1* shuffle, the *yra1* double mutants were obtained  
164 by plasmid shuffling as explained above.

165 The strains with integrated *HA-YRA1* in FSY6881 (NA17 strain with HO  
166 reparable system) (28) were obtained after four back crosses between the  
167 integrated *HA-YRA1 WT* or *HA-yra1(1-210)* and *HA-yra1allKR* mutants in



168 W303 and the NA17 strain. The sporulation, dissection and analysis of the  
169 strains was performed as described above. The presence of the cassette  
170 KanMX::HO-cs at URA3 and KanMX::Clal at LYS2 was checked by PCR  
171 followed by digestion with the restriction enzymes BamH1 (near the HO site)  
172 and Clal.

### 173 **Media and culture conditions**

174 If not specified, yeast strains were thawed on yeast extract-peptone-dextrose  
175 (YPD) plates and grown for two days at 25°C. Cells were pre-cultured in 5 ml  
176 of liquid YPD to reach an OD<sub>600</sub>= 0.7-0.8 at 25°C and diluted into 100 ml YPD  
177 overnight culture to reach OD<sub>600</sub>= 0.8-1 at 25°C in the morning.

178 For the protein stability assays using metabolic depletion of *GAL-HA-YRA1* in  
179 presence of the endogenous wild-type *YRA1* gene, cells expressing HA-Yra1  
180 from the GAL promoter on a centromeric plasmid were grown over-night in  
181 selective medium containing 2% galactose. When reaching OD<sub>600</sub>=0.3, cells  
182 were shifted to selective medium containing 2% glucose to repress *GAL-HA-*  
183 *YRA1* and collected at time 0, 1h, 2h, 3h, 4h, 5h, 6h, and 7h following glucose  
184 addition.

185 To induce the HO endonuclease-mediated irreparable DSB, cells were grown  
186 over-night in SCLGg (SC lactate 2%/glycerol 2% containing 0.05% Glucose).  
187 Cells at OD<sub>600</sub>=0.4 were shifted to SCLGg medium containing 2% glucose for  
188 2h (no cut induction) or to SCLGg medium containing 2% galactose to induce  
189 the HO endonuclease. Cells were collected at 30 minutes, 1h, 2h and 4h  
190 following galactose addition.

191 To induce the HO endonuclease-mediated reparable DSB, cells were grown  
192 over-night in SCLGg (SC lactate 2%/glycerol 2% containing 0.05% Glucose).

193 Exponentially growing cells were treated with 2% galactose to induce the HO  
194 endonuclease or not (control) for 2h. Serial dilutions of 200/100/50 cells were  
195 plated on SCLGg Glu 2%. In another related experiment, serial dilutions of  
196 exponentially growing cells in SCLGg medium were directly plated on SCLGg  
197 Gal 2% or SCLGg Gal 3%-Raf 1% to induce the HO cut, and on SCLGg Glu  
198 2% to repress HO endonuclease expression.

### 199 **Spot test**

200 Cells grown in YPD medium to stationary phase were diluted to  $OD_{600}=1$  and  
201 five 10-fold serial dilutions were prepared for spotting on agar plates. For each  
202 spot, 3 $\mu$ l were deposited on 2% glucose YPD plates in the presence or  
203 absence of drug (Zeocin 25  $\mu$ g/ml, 50  $\mu$ g/ml, and 100  $\mu$ g/ml). Plates were  
204 incubated at 25°C, 30°C, 34°C or 37°C for 3 days.

### 205 **Protein extraction and Western blotting**

206 Cells were grown to  $OD_{600}=1$ . Cell lysis was performed by adding 1 ml H<sub>2</sub>O  
207 with 150 $\mu$ l of Yex-lysis buffer (1.85M NaOH, 7.5% 2-mercaptoethanol) to the  
208 pellet of 5 ODs of cells and kept 10 minutes on ice. Proteins were precipitated  
209 by addition of 150 $\mu$ l of TCA 50% for 10 minutes on ice. The pellet was  
210 resuspended in 30 $\mu$ l of 1X sample buffer (1M Tris-HCl pH6.8, 8 M Urea, 20%  
211 SDS, 0.5M EDTA, 1% 2-mercaptoethanol, 0.05% bromophenol blue). Total  
212 protein extracts were fractionated on SDS-PAGE and examined by Western  
213 blotting with  $\alpha$ HA (Enzo),  $\alpha$ Yra1 (Stutz laboratory),  $\alpha$ Pgk1 (Abcam),  $\alpha$ Rfa1, 2,  
214 3 to detect RPA (kind gift from Vincent Géli),  $\alpha$ GFP (Roche),  $\alpha$ Rad51 (Abcam)  
215 antibodies. For quantitative Western blot analyses, fluorescent secondary  $\alpha$ -  
216 Mouse (IRDye 800CW) and  $\alpha$ -Rabbit (IRDye 680RD) antibodies were used.  
217 The signals were revealed with the LI-COR instrument.

## 218 **Chromatin immunoprecipitation (ChIP) and quantitative real-time PCR**

219 Cells grown to  $OD_{600}=1$  were cross-linked with 1.2% of formaldehyde  
220 (Molecular Biology grade Calbiochem™) for 10 minutes at 25°C under  
221 continuous gentle agitation, quenched with 250mM of glycine (Sigma) for 5  
222 min at 25°C and then on ice for at least 5 min, washed with PBS 1X and  
223 frozen at -20°C. Pellets of 100 ml cultures at  $OD_{600}=1$  were resuspended in  
224 1ml of FA lysis buffer (10mM HEPES KOH pH 7.5, 140mM NaCl, 1mM EDTA  
225 pH 8, 1%Triton X-100, 0.1% sodium deoxycholate) containing a protease  
226 inhibitor cocktail (cOmplete tablets, Mini EDTA-free, Roche). Cells were  
227 mechanically broken with a magnalyser at 6500rpm for 30 seconds (4 times),  
228 and genomic DNA was sonicated for 20 cycles of 30 seconds ON/OFF in  
229 presence of 0.5% SDS added before the sonication step. Samples were  
230 centrifuged at 13000rpm for 15 min at 4°C, and chromatin (supernatant  
231 phase) was quantified by Bradford. For each IP, 1/10 of the total extract was  
232 kept as INPUT for final normalization. Chromatin extracts (500µg) were  
233 incubated at 4°C o/n with a specific antibody. In parallel, magnetic beads  
234 (Dynabeads® Magnetic, Thermo Fisher Scientific) were incubated with BSA 5  
235 mg/ml at 4°C o/n. The magnetic beads were washed twice with FA lysis buffer  
236 and resuspended with the same volume of FA lysis buffer containing a  
237 protease inhibitor cocktail (beads 50% v/v). The chromatin extracts with a  
238 specific antibody were incubated with 30µl of magnetic beads for 4h at 4°C on  
239 a rotating wheel. The magnetic beads were then washed twice with FA lysis  
240 buffer, twice with FA 500 (50mM HEPES KOH pH 7.5, 500mM NaCl, 1mM  
241 EDTA pH 8, 1%Triton X-100, 0.1% sodium deoxycholate), once with Buffer III  
242 (20mM Tris-HCl pH 8, 1mM EDTA pH 8, 250mM LiCl, 0.5% NP40, 0.5%

243 sodium deoxycholate) and once with TE 1X (100mM Tris-HCl pH 8, 10mM  
244 EDTA pH 8). DNA was eluted with 200µl of elution buffer (50mM Tris-HCl pH  
245 7.5, 1% SDS) at 65°C for 20 minutes. IP and INPUT DNAs were finally de-  
246 crosslinked with proteinase K (Roche) (0.4 µg/µl) for 2 hours at 42°C, and o/n  
247 at 65°C. The decrosslinked IP and INPUT DNAs were purified (Promega,  
248 Wizard® Genomic DNA Purification Kit). IP and INPUT (2µl) were quantified  
249 by qPCR with SYBR® Green PCR Master Mix (Applied Biosystems) using  
250 specific primers.

251 The following antibodies were used: a rabbit polyclonal αHA antibody (Enzo),  
252 a rabbit polyclonal αYra1 antibody and corresponding pre-immune (Stutz  
253 laboratory).

#### 254 **Ubiquitination and Sumoylation assays**

255 Ubiquitination and sumoylation assays were performed essentially as  
256 described (8, 29, 30) using cells transformed with a plasmid expressing His6-  
257 Ubi or His6-SUMO from a copper inducible promoter ( $P_{CUP1}$ ). Briefly  
258 Ubiquitin/SUMO expression was induced with 0.1 mM CuSO<sub>4</sub> overnight or for  
259 3h. Cell cultures (200 ml) at OD<sub>600</sub>=1 were collected adding TCA 5% for 20  
260 minutes to allow protein precipitation. Cell pellets were washed twice with  
261 acetone 100%. Dry pellets were resuspended with 1ml of Guanidinium buffer  
262 (100 mM sodium phosphate at pH 8, 10 mM Tris-HCl, 6 M guanidinium, 10  
263 mM imidazole, 0.2% Triton X-100, 10 mM NEM, complete protease inhibitor  
264 mix [Roche]) prior to cell disruption with glass beads in a magnalyser (6  
265 cycles at 6500 rpm for 1 minute).

266 Cells lysates were spun at 13000 rpm for 20 min. Between 5-8 mg of protein  
267 from the supernatant was incubated with 100µl of Ni-NTA acid-agarose

268 (Qiagen) for 2h at room temperature on a rotating wheel. Agarose beads were  
269 washed once with Guanidinium buffer and three times with Urea buffer (100  
270 mM sodium phosphate at pH 6.8, 10 mM Tris-HCl, 8M urea, 20 mM  
271 imidazole, 0.2% Triton X-100, complete protease inhibitor mix [Roche]). His6-  
272 ubiquitinated and His6-SUMOylated proteins were eluted with 40  $\mu$ l of Sample  
273 Buffer and boiled for 5 min at 95°C. 20 $\mu$ l samples were analyzed by Western  
274 blot with the relevant antibodies:  $\alpha$ HIS for ubiquitinated or SUMOylated  
275 proteins,  $\alpha$ HA for ubiquitinated or SUMOylated HA-Yra1. Input samples were  
276 also precipitated with TCA 5%, the pellets resuspended with Sample Buffer  
277 and boiled 5 min at 95°C to be analyzed by Western Blot with  $\alpha$ HA for HA-  
278 Yra1 and  $\alpha$ Pgk1 as loading control.

### 279 **FISH experiments**

280 The FISH experiments on the *YRA1* shuffled strains deleted for various  
281 ubiquitin ligases were done essentially as described in (8), while the FISH  
282 experiments on the different HA-YRA1 integrated strains were performed as  
283 described in (31). In the latter case, images were taken with the Zeiss  
284 LSM700 confocal microscope using laserline 405 nm for DAPI detection and  
285 laserline 555 nm for Cy3. Transmission light images were taken to see the cell  
286 shape. In both cases Poly(A)<sup>+</sup>mRNA in situ hybridization was performed with  
287 a Cy3-labeled oligo-dT<sub>(50)</sub> probe.

### 288 **Colony Forming Unit Assay (CFU)**

289 Three serial dilutions (200/100/50) of exponentially growing cells in  
290 SCLGg medium were plated on SCLGg Gal 2% or SCLGg Gal 3%-Raf 1% or  
291 SCLGg Glu 2% and incubated at 25°C for 5 days. CFUs were counted and the

292 % of colonies was expressed as CFU relative to the CFU grown on SCLGg Glu

293 2% (control).

294

295 **RESULTS**

296

297 **Yra1 is modified by the SUMO-targeted E3 ubiquitin ligase Slx5-Slx8**

298 Previous work from our laboratory showed that Yra1 ubiquitination by  
299 Tom1 elicits Yra1 dissociation from mRNPs, presumably in the context of the  
300 nuclear pore complex (NPC), allowing proper mRNP export into the cytoplasm  
301 (8). Intriguingly, Yra1 ubiquitination is not fully abrogated in the  $\Delta tom1$  mutant,  
302 suggesting that other E3 ligases are involved in Yra1 regulation, possibly for  
303 other Yra1 functions. In view of the putative role of Yra1 in genome stability,  
304 we wondered whether this protein could be modified by SUMO-dependent  
305 ubiquitination. Consistently, we identified the SUMO-targeted E3 ubiquitin  
306 ligase (STUbL) complex Slx5-Slx8 to be responsible for Yra1 ubiquitination  
307 together with Tom1 (**Fig 1**).

308 **Fig 1: Yra1 is a sumoylated protein targeted for ubiquitination by the**  
309 **SUMO-dependent ubiquitin ligase Slx5-8. (A)** Yra1 ubiquitination depends  
310 on the STUbL Slx5-Slx8 and Tom1. Ubiquitination assay of shuffled *HA-YRA1*  
311 in wild-type and in  $\Delta tom1$ ,  $\Delta slx8$ ,  $\Delta slx5$ ,  $\Delta slx8\Delta tom1$ ,  $\Delta slx5\Delta tom1$  and  
312  $\Delta slx8\Delta slx5$  mutant backgrounds. Strains were transformed with a copper  
313 inducible His-Ubiquitin expressing 2 $\mu$  plasmid (+) or an empty vector (-). His-  
314 Ubiquitin was induced with copper over night. His-Ubiquitinated proteins were  
315 affinity-purified and the Ubiquitinated forms of Yra1 detected by Western Blot  
316 with  $\alpha$ HA antibodies. Western Blot of input samples with  $\alpha$ HA antibody was  
317 used to assess input Yra1 levels. One representative experiment of 3 is  
318 shown. **(B)** Yra1 is sumoylated. Sumoylation assay in wild-type and *HA-YRA1*  
319 backgrounds. Strains were transformed with a copper inducible His-SUMO  
320 expressing 2 $\mu$  plasmid (+) or with an empty vector (-). His-SUMO was induced  
321 with copper for 3h. His-sumoylated proteins were affinity-purified and the  
322 sumoylated forms of Yra1 detected by Western Blot with  $\alpha$ HA antibodies.  
323 Western Blot of input samples with  $\alpha$ HA was used to assess input Yra1 levels.  
324 One representative experiment of 3 is shown. **(C)** Yra1 is sumoylated by  
325 Siz1/Siz2. Yra1 sumoylation assay in wild-type as well as  $\Delta siz1$ ,  $\Delta siz1/siz2$ ,  
326  $\Delta siz2$  and *mms21* mutant backgrounds. Strains were transformed with a  
327 copper inducible His-SUMO expressing 2 $\mu$  plasmid. His-SUMO was induced  
328 with copper for 3h. His-SUMOylated proteins were affinity purified and the  
329 SUMOylated forms of Yra1 detected by Western Blot with an  $\alpha$ Yra1 antibody.  
330 Western Blot of input samples with  $\alpha$ Yra1 was used to assess input Yra1  
331 levels. One representative experiment of 2 is shown.



332 The ubiquitination assay of HA-Yra1 in wild-type and in  $\Delta tom1$ ,  $\Delta slx5$ ,  
333  $\Delta slx8$ ,  $\Delta slx5\Delta slx8$ ,  $\Delta slx5\Delta tom1$ ,  $\Delta slx8\Delta tom1$  mutant backgrounds showed that  
334 the Yra1 ubiquitination detected in the  $\Delta tom1$  mutant was completely  
335 abrogated in the  $\Delta slx5\Delta tom1$  and  $\Delta slx8\Delta tom1$  double mutants (**Fig 1A**),  
336 indicating a role for both the Slx5-Slx8 and Tom1 E3 ligases in Yra1  
337 regulation. Since the Slx5-Slx8 E3 ligase complex is stimulated by substrate  
338 sumoylation (32), and in view of the reported identification of Yra1 as  
339 potentially sumoylated in a proteome-wide study (33), we confirmed that Yra1  
340 is indeed sumoylated (**Fig 1B** and **1C**). Both Siz1 and Siz2 SUMO E3 ligases  
341 are involved in this modification as Yra1 sumoylation is fully abrogated in the  
342  $\Delta siz1\Delta siz2$  double mutant background (**Fig 1C**). Furthermore, Yra1 is de-  
343 sumoylated by the SUMO protease Ulp1 as Yra1 sumoylation increased in the  
344 *ulp1* temperature-sensitive (*ts*) mutant (**Supplementary Fig S1A**). These data  
345 support the hypothesis that Yra1 is regulated both by sumoylation and  
346 ubiquitination. In addition, HA-Yra1 ubiquitination was increased in the *ulp1 ts*  
347 mutant compared to a wild-type background, suggesting a possible  
348 stimulating effect of sumoylation on ubiquitination (**Supplementary Fig S1B**).

349 Known targets of Slx5-Slx8 are controlled by ubiquitin-dependent  
350 proteasomal degradation (34-38). To define whether Yra1 ubiquitination by  
351 Slx5-Slx8 may target Yra1 to degradation, we used metabolic depletion to  
352 examine Yra1 turnover. Because *YRA1* is essential, an HA-tagged version of  
353 *YRA1* was expressed from a galactose-inducible promoter on a plasmid  
354 transformed into a strain expressing a wild-type *YRA1* gene. Switching cells  
355 from galactose to glucose-containing medium represses *GAL-HA-YRA1* gene  
356 expression and allows following the decay of the HA-Yra1 protein in different

357 genetic backgrounds. Under metabolic glucose repression, HA-Yra1 has a  
358 half-life of 3.8h (**Supplementary Fig S2A**). No significant stabilization of HA-  
359 Yra1 protein was detected in  $\Delta slx8$ ,  $\Delta slx5$ ,  $\Delta tom1$  or  $\Delta slx8\Delta tom1$   
360 (**Supplementary Fig S2B and S2C**), suggesting that ubiquitination by Slx5-  
361 Slx8 does not lead to Yra1 degradation by the proteasome.

362 We previously proposed that Yra1 regulation by Tom1 is linked to the  
363 function of Yra1 in mRNP export (1, 8). Visualization of poly(A)+ RNA  
364 distribution by fluorescence in situ hybridization (FISH) in the  $\Delta slx5$  and  $\Delta slx8$   
365 single mutants did not show any nuclear poly(A)+ RNA retention while the  
366  $\Delta slx5\Delta tom1$  (32.3%) and  $\Delta slx8\Delta tom1$  (26%) double mutants had mRNA  
367 export defects comparable to the  $\Delta tom1$  mutant (30.8%) (**Supplementary Fig**  
368 **S3A**). These observations suggest that Yra1 ubiquitination by Slx5-Slx8 may  
369 regulate a function of Yra1 distinct from mRNA export.

370

### 371 **Loss of the Yra1 C-box sensitizes the genome to DSBs**

372 Since our data indicate that Yra1 is modified by Slx5-Slx8, a STUbL  
373 important for genome stability (39), we examined whether the abrogation of  
374 Yra1 ubiquitination induces defects in genome integrity. For this purpose, we  
375 used the *HA-yra1allKR* mutant that cannot be ubiquitinated since all the  
376 Lysines (K) are replaced by Arginines (R) (**Fig 2A**) (8).

377 **Fig 2: The Yra1 C-box, but not Yra1 ubiquitination, is important for**  
378 **genome stability. (A)** Scheme of Yra1 mutants used in this study. **(B)** Left:  
379 Western Blot analysis of HA-Yra1 levels in integrated *HA-YRA1 WT*, *HA-*  
380 *yra1(1-210)*, *HA-yra1allKR*, was performed using an  $\alpha$ HA antibody; an  $\alpha$ Pgk1  
381 antibody was used as loading control. One representative Western blot is  
382 shown. Right: Western blot quantification showing the HA-Yra1/Pgk1 ratio of  
383 three experiments with relative standard error of the mean. The  
384 quantifications were performed using Lycor Software. **(C)** Spot test analysis of  
385 confluent cells at 25°C, 30°C, 34°C, 37°C of *YRA1 WT* (No Tag), integrated  
386 *HA-YRA1 WT*, *HA-yra1(1-210)*, and *HA-yra1allKR* strains on YEPD 2%  
387 Glucose. **(D)** Spot test analysis on YEPD 2% Glu, Zeocin 25  $\mu$ g/ml, 50  $\mu$ g/ml  
388 and 100  $\mu$ g/ml at 25°C of confluent cells of integrated *HA-YRA1 WT* and *HA-*  
389 *yra1* mutants as well as  $\Delta rad52$  strains.

390  
391 We also used the *HA-yra1(1-210)* mutant which codes for a protein that  
392 is still ubiquitinated (data not shown) but lacks the highly conserved 16 C-  
393 terminal amino-acids (**Fig 2A**). Because Yra1 levels are maintained through  
394 splicing autoregulation, the intron was retained in both wild-type and mutant  
395 HA-YRA1 constructs to limit the potential toxic effect of Yra1 overexpression (4,  
396 10, 12, 13, 16). Although the C-terminal domain has been implicated in splicing  
397 inhibition (4), the *HA-yra1(1-210)* protein is only mildly overexpressed  
398 compared to wild-type HA-Yra1 or the *HA-yra1allKR* mutant protein and  
399 presents only a slight growth defect at 25°C (**Fig 2B and C**). Both mutants are  
400 thermosensitive as shown by spot test analysis at different temperatures (25°C-  
401 30°C-34°C-37°C) (**Fig 2C**). FISH analysis did not reveal any nuclear poly(A)+  
402 RNA retention at 25°C indicating that the two mutants have no mRNA export

403 defect in the conditions used in this study (**Supplementary Fig S3B**) (7).  
404 Interestingly, additional spot test analyses in the presence of Zeocin, indicated  
405 that the *HA-yra1(1-210)* but not the *HA-yra1 $\Delta$ IKR* mutant is sensitive to this  
406 genotoxic drug (**Fig 2D**). This observations indicates that the Yra1 C-box is  
407 important for genome stability in the presence of DNA double strand breaks  
408 (DSBs) while Yra1 ubiquitination is not.

409

#### 410 **Yra1 is recruited to an irreparable DSB (HO cut)**

411 To obtain more direct evidence for a possible role of Yra1 in the DNA  
412 damage response pathway (DDR), we induced an irreparable DSB at the  
413 MAT locus using a galactose-inducible HO endonuclease as described (25)  
414 (**Supplementary Fig S4A**). Consistent with the irreparable nature of the  
415 induced HO cuts, these strains do not grow on galactose (**Supplementary**  
416 **Fig S5A**). Importantly, Yra1 recruitment at the HO cut, examined by ChIP with  
417 an  $\alpha$ Yra1 antibody, was significant at regions close to the DSB after 2h of HO  
418 induction (**Fig 3A**).

419 **Fig 3: Yra1 is recruited to an irreparable DSB HO cut site. (A)** Yra1  
420 recruitment at the HO cut site was defined by ChIP with an  $\alpha$ Yra1 antibody  
421 after 0.5h, 1h, 2h and 4h of HO endonuclease induction with galactose using  
422 the GA6844 strain described in (25). The 2h Glucose time point was used as  
423 no cut control. ChIP values are indicated as percentage of input at 0.6Kb,  
424 1.6Kb, 4.5Kb, 9.6Kb and 23Kb from the HO cut. The average of 6  
425 experiments is shown with corresponding standard error of the mean. Two  
426 way ANOVA test was performed with multiple comparisons; P values < 0.05  
427 (\*), < 0.01 (\*\*), < 0.001 (\*\*\*) that refer to Glu 2h (no cut) are shown. **(B)** Yra1  
428 mutants are differentially recruited to the irreparable HO cut site. ChIP using  
429  $\alpha$ HA antibody of HA-Yra1 WT, HA-yra1(1-210), HA-yra1allKR, Yra1WT (no  
430 tag) at 0.6 Kb from the HO cut site after 2h of HO induction with Galactose  
431 using the strains with *HA-YRA1 WT* or mutants integrated in strain GA6844  
432 described in (25). The 2h Glucose time point was taken as no cut control.  
433 ChIP values are shown as percentage of input. The average of 3 independent  
434 experiments is shown with corresponding standard error of the mean. **(C)**  
435 RPA recruitment to the HO cut site in *HA-YRA1 WT* and *HA-yra1* mutants.  
436 ChIP using  $\alpha$ RPA antibody at 0.6 Kb from the HO cut site after 2h of HO  
437 induction with Galactose in the same strains as in (B). The 2h Glucose time  
438 point was taken as no cut control. ChIP values are indicated as percentage of  
439 input. The average of 3 independent experiments is shown with  
440 corresponding standard error of the mean.

441  
442 Considering that the efficiency of the cut is nearly 100% after 30' of HO  
443 induction (25) (**Supplementary Fig S6A**), the recruitment after 2h suggests it  
444 may depend on extensive resection.

445 To define whether the sensitivity to Zeocin of the *HA-yra1(1-210)*  
446 mutant may be due to its impaired recruitment to DSB loci, sequences  
447 encoding HA-tagged wild-type or mutant Yra1 (*HA-YRA1 WT*, *HA-yra1(1-210)*  
448 and *HA-yra1allKR*) were integrated into the irreparable HO DSB strain at the  
449 *YRA1* locus and the recruitment of these different HA-Yra1 proteins at the HO  
450 cut was examined by CHIP using  $\alpha$ HA antibodies after 2h in galactose (**Fig**  
451 **3B**), which induces efficient HO cleavage in both wild-type and mutant strains  
452 (**Supplementary Fig S6B**). These experiments show that the *HA-yra1allKR*  
453 protein is recruited to the HO cut site to similar levels as the *HA-Yra1 WT* in  
454 Galactose (HO cut) (**Fig 3B**). In contrast, although in this experiment the *HA-*  
455 *yra1(1-210)* protein is expressed to slightly higher levels than *HA-Yra1 WT*  
456 (**Supplementary Fig S5B and S5C**), its binding to the HO site does not  
457 increase in galactose, suggesting that the Yra1 C-terminal region is important  
458 for Yra1 recruitment to the DSB. Since Yra1 is recruited to the HO cut 2h after  
459 Gal induction, once there has been extensive resection, we asked whether  
460 RPA binding to the HO cut might vary in the different *HA-yra1* mutants. RPA  
461 association was not affected in the *HA-yra1* mutants despite the lack of *HA-*  
462 *yra1(1-210)* recruitment (**Fig 3C**), suggesting that RPA binding is probably not  
463 dependent on Yra1 recruitment.

464

#### 465 **The Yra1 C-terminal region is important for DSB repair (HO cut)**

466 Since irreparable DSBs relocate to the nuclear pore in G1/S phase (26)  
467 within 2h after cut induction (25), one possibility is that Yra1 recruitment to  
468 irreparable DSB is the consequence of HO cut re-localization to pores. To  
469 exclude this possibility, we took advantage of an HO cut reparable system

470 **(Supplementary Fig S4B)** (28), since the DSB repair occurs within the  
471 nuclear interior (40, 41). To define whether the *HA-yra1* mutants may be  
472 defective in DSB repair, the *HA-YRA1 WT*, *HA-yra1(1-210)* and *HA-*  
473 *yra1 $\Delta$ allKR* sequences were integrated at the *YRA1* locus of the reparable HO  
474 DSB strain and the percentage of cells surviving under HO cut induction was  
475 examined.

476 Three serial dilutions of exponentially growing cells were plated on  
477 galactose 2% or galactose 3%-raffinose 1% to induce the HO cut, and on  
478 glucose 2% to repress HO endonuclease expression. CFUs were counted as  
479 an indication of cells able to repair the DSB in the *HA-YRA1 WT*, *HA-yra1(1-*  
480 *210)*, *HA-yra1allKR* strains transformed with a pGAL-HO endonuclease  
481 plasmid or Empty Vector; a *No-Tag* and a  *$\Delta$ rad52* strain transformed with the  
482 Empty Vector only were used as controls as these two strains contain an  
483 endogenous pGAL-HO endonuclease sequence (**Fig 4A**).

484 **Fig 4: Survival under persistent induction of a reparable HO cut. (A)** The  
485 Yra1 C-box is important for DSB repair. Three serial dilutions (200/100/50) of  
486 exponentially growing cells of NA17 strain (28) containing integrated *HA-*  
487 *YRA1 WT* (WT), *HA-yra1(1-210)*, *HA-yra1allKR* and transformed with pGAL-  
488 HO endonuclease containing plasmid or Empty Vector, as well as of No-Tag  
489 (NA17) and  $\Delta rad52$  strains containing endogenous pGAL-HO endonuclease  
490 and transformed with an Empty Vector were prepared. Diluted cells were  
491 plated on SCLGg Gal 2% or Gal 3%-Raf1% to constantly induce HO cut, and  
492 on SCLGg Glu 2% to repress HO endonuclease expression. The percentage  
493 of colonies was determined as the relative number of Colony Forming Units  
494 (CFUs) in each strain plated on SCLGg Gal 2% or Gal 3%-Raf1% compared  
495 to the one plated on SCLGg Glu 2%. To normalize the variability in growth  
496 due to the different media condition, the CFUs of each strain transformed with  
497 pGAL-HO endonuclease were normalized to the corresponding strain  
498 transformed with the empty vector (%CFU= (%CFU on SCLGg Gal 2% pGAL-  
499 HO/EV)/ (% CFU on SCLGg Glu 2% pGAL-HO/EV). The average of 3  
500 independent experiments for each condition SCLGg Gal 2%/ Glu 2% and  
501 SCLGg Gal 3%-Raf 1%/ Glu 2% is shown with corresponding standard error  
502 of the mean. One way ANOVA test was performed with multiple comparisons  
503 and P value < 0.001 (\*\*) is shown on the graph referring to *HA-YRA1 WT*. **(B)**  
504 Yra1 C-box is important for DSB repair. Spot test analysis on Leu- SCLGg Glu  
505 2%, SCLGg Gal 2%, SCLGg Gal 3%-Raf 1%, at 25°C of exponentially  
506 growing *HA-YRA1 WT* (WT), *HA-yra1(1-210)*, *HA-yra1allKR* (transformed with  
507 pGAL-HO endonuclease containing plasmid or Empty Vector); No-Tag and  
508  $\Delta rad52$  strains (containing endogenous pGAL-HO endonuclease sequence



509 and transformed with an empty vector) served as controls. One representative  
510 experiment out of 3 is shown.

511  
512 Interestingly, like the  $\Delta rad52$  control strain, the *HA-yra1(1-210)* mutant  
513 was not able to grow on galactose when the reparable HO cut is induced,  
514 indicating that the Yra1 C-box is important for DSB repair. This effect was  
515 confirmed by spot test analysis (**Fig 4B**). Moreover, although both *HA-yra1*  
516 mutants have comparable cut efficiency after 2h in Galactose  
517 (**Supplementary Fig S6C**), the *HA-yra1 $\Delta allKR$*  showed no growth defect  
518 under HO cut induction whether in the CFU assay or the spot test, indicating  
519 that Yra1 ubiquitination is not required for DSB repair (**Fig 4A and 4B**).

520 Overall these observations support the view that Yra1 is important for  
521 DSB repair in a process dependent on the 16 amino acids C-terminal region.  
522 Absence of this domain may result in the inability to repair HO cuts possibly  
523 because of the reduced capacity of Yra1 to interact with the DSB.

525 **DISCUSSION**  
526

527           This study strengthens the importance of Yra1 in genome stability. In  
528 particular, our data provide evidence that the Yra1 C-terminal box is crucial for  
529 DSB repair. We have started to investigate the sensitivity of *yra1* mutants to  
530 DNA damage based on the observation that Yra1 is not only sumoylated by  
531 Siz1-Siz2 but also ubiquitinated by Slx5-Slx8, a SUMO-dependent E3 ligase  
532 important for genome stability (**Fig 1**). However, our data indicate that Yra1  
533 ubiquitination is not important for DSB repair since the *HA-yra1allKR* mutant  
534 that completely abrogates Yra1 ubiquitination (8) does not display any genetic  
535 instability phenotypes.

536           To investigate the effect of Yra1 on genome stability, we rather took  
537 advantage of the *HA-yra1(1-210)* mutant that lacks the Yra1 C-box domain  
538 (**Fig 2**) without any obvious mRNA export defect (**Supplementary Fig S3**).  
539 Interestingly, our data show that the *HA-yra1(1-210)* mutant is sensitive to the  
540 DSB inducing genotoxic agent Zeocin (**Fig 2**). In line with these results, it was  
541 recently published that the DAMP allele of *YRA1* is specifically sensitive to  
542 Zeocin (18). Overall, these observations suggest that lack of the Yra1 C-box  
543 or reduced levels of Yra1 either promote DSBs or impair DSB repair.

544           A recent study has revealed that Npl3, an RNA binding protein involved  
545 in mRNP biogenesis, contributes to DSB resection by ensuring efficient  
546 production of *EXO1* mRNA (42). While Npl3 was proposed to have an  
547 indirect role in repair, our observations indicate that Yra1 is recruited to an  
548 irreparable DSB after 2h of cut induction and therefore extensive resection,  
549 consistent with a direct role of Yra1 in DSB repair (**Fig 3B**). Importantly, the

550 recruitment to an irreparable DSB does not depend on Yra1 ubiquitination but  
551 requires the conserved C-box suggesting this domain may be involved in  
552 repair, although it has no effect on RPA binding to the locus (**Fig 3B and 3C**).  
553 However, we cannot fully exclude that Yra1 recruitment to irreparable DSBs  
554 may be the consequence of HO cut re-localization to the nuclear pore that  
555 occurs within 2h after cut induction (25). Furthermore, we also examined  
556 whether the irreparable DSB can be repaired by alternative pathways such as  
557 Non Homologous End Joining (NHEJ) (19) or Break Induced Repair (BIR)  
558 (26) by inducing the HO cut in the *HA-yra1* mutants for 2h and plating the  
559 cells on Glucose. The *HA-yra1allKR* and *HA-yra1(1-210)* mutants showed  
560 survival rates comparable to *HA-YRA1 WT* indicating that the Yra1 C-box and  
561 Yra1 ubiquitination do not contribute to alternative repair pathways (data not  
562 shown).

563 To directly address DSB repair efficiency in the *HA-yra1allKR* and *HA-*  
564 *yra1(1-210)* mutants, we used the HO reparable system described in (28).  
565 Unfortunately, we were unable to observe significant recruitment of Yra1 to  
566 this type of DSB by ChIP, probably because the HO reparable system is more  
567 dynamic (data not shown). However, an independent recent study identified  
568 Yra1 at an HO-induced reparable DSB using ChAP-MS (Chromatin Affinity  
569 Purification with mass spectrometry) (18). These data indicate that Yra1 is  
570 recruited to the DSB locus also when the HO cut is located within the nucleus  
571 (40, 43). Thus, the observed Yra1 binding at the irreparable HO cut (**Fig 3A**  
572 **and 3B**) may be specific rather than the indirect consequence of DSB  
573 relocalization to the nuclear periphery.

574 Besides detecting Yra1 at reparable DSBs, the recent study by Wang  
575 et al. (18) also shows that a Yra1 DAmP hypomorph mutant has a defect in  
576 global DSB repair following Zeocin treatment comparable to that observed in  
577 the absence of the central Rad52 repair protein. As discussed by the authors,  
578 this global effect probably results from the reduced expression of Rad51 due  
579 to defective mRNA biogenesis and export activity in the presence of low levels  
580 of Yra1. The same study investigated the importance of Yra1 in the repair of a  
581 single HO cut using the Yra1 anchor away system. These experiments were  
582 unable to demonstrate a role for Yra1 in this process possibly because the  
583 conditions used to deplete Yra1 by anchor away were not optimal.

584 Since irreparable DSBs lead to cell death (19), we addressed the  
585 critical role of Yra1 in DSB repair by defining the repair efficiency of the *HA-*  
586 *yra1allKR* and  $\square\square\square$ *yra1(1-210)* mutants based on survival under induction of  
587 a reparable HO cut (**Fig 4**). Interestingly, while the *HA-yra1allKR* mutant has  
588 not effect, the *HA-yra1(1-210)* mutant exhibits very poor survival, comparable  
589 to that observed in  $\Delta$ *rad52* (**Fig 4**). Since the *HA-yra1(1-210)* strain has no  
590 obvious mRNA export phenotype and exhibits normal Rad51 levels  
591 (**Supplementary Fig S3 and S7**), the data support the hypothesis that Yra1  
592 may play a direct role in DSB repair and that the C-box is required for its  
593 recruitment to the damaged site (**Fig 3B**). In conclusion, one view is that C-  
594 box-dependent Yra1 recruitment is important for repair possibly by favoring  
595 optimal Rad52 action and homologous recombination at the DSB.

596 While our data show that Yra1 ubiquitination is not required for DSB  
597 repair, we cannot exclude that Yra1 sumoylation and ubiquitination by Slx5-  
598 Slx8 may facilitate relocalization of irreparable DSBs to nuclear pores (25,

599 26). The physiological relevance of irreparable DSB relocation to the nuclear  
600 periphery is still not fully clear. It has been speculated that it leads to  
601 proteasomal degradation of DSB-bound proteins targeted by the STUbL Slx5-  
602 Slx8 (25) to induce alternative repair pathways such as Break Induced  
603 Replication (26). In that respect, our data show that ubiquitination by Slx5-  
604 Slx8 does not lead to Yra1 degradation (**Supplementary Fig S2**).  
605 Furthermore, Yra1 ubiquitination is not required for survival after irreparable  
606 DSB induction suggesting that it is not important for non-canonical repair  
607 (data not shown).

608 In summary, this work indicates that at physiological expression levels,  
609 Yra1 is beneficial for genome stability by facilitating the repair of DSBs in a C-  
610 box-dependent and sumoylation/ubiquitination independent manner. Future  
611 studies should address how Yra1 recruitment to DSBs may contribute to  
612 repair through homologous recombination.

## 613 **ACKNOWLEDGMENTS**

614 We would like to thank D. Picard and T. Halazonetis as well as members of  
615 the lab for discussions; we also are grateful to S. Gasser and M. Kupiec for  
616 strains and plasmids.

## 617 **AUTHOR CONTRIBUTIONS**

618 V.I., E.T., and BP designed and performed experiments. N.Y.M, A.Z, V.G.M  
619 and G.S. performed experiments. V.I. and F.S. conceived experiments and  
620 wrote the paper.

621

622

## 623 REFERENCES

- 624 1. Tutucci E, Stutz F. Keeping mRNPs in check during assembly and  
625 nuclear export. *Nat Rev Mol Cell Biol.* 2011;12(6):377-84.
- 626 2. Portman DS, O'Connor JP, Dreyfuss G. YRA1, an essential  
627 *Saccharomyces cerevisiae* gene, encodes a novel nuclear protein with  
628 RNA annealing activity. *RNA.* 1997;3(5):527-37.
- 629 3. Stutz F, Bachi A, Doerks T, Braun IC, Seraphin B, Wilm M, et al. REF,  
630 an evolutionary conserved family of hnRNP-like proteins, interacts with  
631 TAP/Mex67p and participates in mRNA nuclear export. *RNA.*  
632 2000;6(4):638-50.
- 633 4. Preker PJ, Guthrie C. Autoregulation of the mRNA export factor Yra1p  
634 requires inefficient splicing of its pre-mRNA. *RNA.* 2006;12(6):994-1006.
- 635 5. Strasser K, Masuda S, Mason P, Pfannstiel J, Oppizzi M, Rodriguez-  
636 Navarro S, et al. TREX is a conserved complex coupling transcription  
637 with messenger RNA export. *Nature.* 2002;417(6886):304-8.
- 638 6. Burd CG, Dreyfuss G. Conserved structures and diversity of functions of  
639 RNA-binding proteins. *Science.* 1994;265(5172):615-21.
- 640 7. Zenklusen D, Vinciguerra P, Strahm Y, Stutz F. The yeast hnRNP-Like  
641 proteins Yra1p and Yra2p participate in mRNA export through interaction  
642 with Mex67p. *Mol Cell Biol.* 2001;21(13):4219-32.
- 643 8. Iglesias N, Tutucci E, Gwizdek C, Vinciguerra P, Von Dach E, Corbett  
644 AH, et al. Ubiquitin-mediated mRNP dynamics and surveillance prior to  
645 budding yeast mRNA export. *Genes Dev.* 2010;24(17):1927-38.
- 646 9. Dong S, Li C, Zenklusen D, Singer RH, Jacobson A, He F. YRA1  
647 autoregulation requires nuclear export and cytoplasmic Edc3p-mediated  
648 degradation of its pre-mRNA. *Molecular cell.* 2007;25(4):559-73.
- 649 10. Espinet C, de la Torre MA, Aldea M, Herrero E. An efficient method to  
650 isolate yeast genes causing overexpression-mediated growth arrest.  
651 *Yeast.* 1995;11(1):25-32.
- 652 11. Reed R, Hurt E. A conserved mRNA export machinery coupled to pre-  
653 mRNA splicing. *Cell.* 2002;108(4):523-31.
- 654 12. Preker PJ, Kim KS, Guthrie C. Expression of the essential mRNA export  
655 factor Yra1p is autoregulated by a splicing-dependent mechanism. *RNA.*  
656 2002;8(8):969-80.
- 657 13. Rodriguez-Navarro S, Strasser K, Hurt E. An intron in the YRA1 gene is  
658 required to control Yra1 protein expression and mRNA export in yeast.  
659 *EMBO Rep.* 2002;3(5):438-42.
- 660 14. Fong CM, Arumugam A, Koepp DM. The *Saccharomyces cerevisiae* F-  
661 box protein Dia2 is a mediator of S-phase checkpoint recovery from DNA  
662 damage. *Genetics.* 2013;193(2):483-99.
- 663 15. Swaminathan S, Kile AC, MacDonald EM, Koepp DM. Yra1 is required  
664 for S phase entry and affects Dia2 binding to replication origins. *Mol Cell*  
665 *Biol.* 2007;27(13):4674-84.
- 666 16. Gavalda S, Santos-Pereira JM, Garcia-Rubio ML, Luna R, Aguilera A.  
667 Excess of Yra1 RNA-Binding Factor Causes Transcription-Dependent  
668 Genome Instability, Replication Impairment and Telomere Shortening.  
669 *PLoS Genet.* 2016;12(4):e1005966.
- 670 17. Garcia-Rubio M, Aguilera P, Lafuente-Barquero J, Ruiz JF, Simon MN,  
671 Geli V, et al. Yra1-bound RNA-DNA hybrids cause orientation-

- 672 independent transcription-replication collisions and telomere instability.  
673 *Genes Dev.* 2018;32(13-14):965-77.
- 674 18. Wang P, Byrum S, Fowler FC, Pal S, Tackett AJ, Tyler JK. Proteomic  
675 identification of histone post-translational modifications and proteins  
676 enriched at a DNA double-strand break. *Nucleic Acids Res.*  
677 2017;45(19):10923-40.
- 678 19. Zhao X, Wei C, Li J, Xing P, Li J, Zheng S, et al. Cell cycle-dependent  
679 control of homologous recombination. *Acta Biochim Biophys Sin*  
680 (Shanghai). 2017;49(8):655-68.
- 681 20. Symington LS, Gautier J. Double-strand break end resection and repair  
682 pathway choice. *Annu Rev Genet.* 2011;45:247-71.
- 683 21. Altmannova V, Kolesar P, Krejci L. SUMO Wrestles with Recombination.  
684 *Biomolecules.* 2012;2(3):350-75.
- 685 22. Jalal D, Chalissery J, Hassan AH. Genome maintenance in  
686 *Saccharomyces cerevisiae*: the role of SUMO and SUMO-targeted  
687 ubiquitin ligases. *Nucleic Acids Res.* 2017;45(5):2242-61.
- 688 23. Ulrich HD. Ubiquitin and SUMO in DNA repair at a glance. *J Cell Sci.*  
689 2012;125(Pt 2):249-54.
- 690 24. Sarangi P, Zhao X. SUMO-mediated regulation of DNA damage repair  
691 and responses. *Trends Biochem Sci.* 2015;40(4):233-42.
- 692 25. Nagai S, Dubrana K, Tsai-Pflugfelder M, Davidson MB, Roberts TM,  
693 Brown GW, et al. Functional targeting of DNA damage to a nuclear pore-  
694 associated SUMO-dependent ubiquitin ligase. *Science.*  
695 2008;322(5901):597-602.
- 696 26. Horigome C, Bustard DE, Marcomini I, Delgosaie N, Tsai-Pflugfelder M,  
697 Cobb JA, et al. PolySUMOylation by Siz2 and Mms21 triggers relocation  
698 of DNA breaks to nuclear pores through the Slx5/Slx8 STUbL. *Genes*  
699 *Dev.* 2016;30(8):931-45.
- 700 27. Horigome C, Oma Y, Konishi T, Schmid R, Marcomini I, Hauer MH, et al.  
701 SWR1 and INO80 chromatin remodelers contribute to DNA double-  
702 strand break perinuclear anchorage site choice. *Mol Cell.*  
703 2014;55(4):626-39.
- 704 28. Agmon N, Liefshitz B, Zimmer C, Fabre E, Kupiec M. Effect of nuclear  
705 architecture on the efficiency of double-strand break repair. *Nat Cell Biol.*  
706 2013;15(6):694-9.
- 707 29. Bretes H, Rouviere JO, Leger T, Oeffinger M, Devaux F, Doye V, et al.  
708 Sumoylation of the THO complex regulates the biogenesis of a subset of  
709 mRNPs. *Nucleic Acids Res.* 2014;42(8):5043-58.
- 710 30. Bonnet A, Bretes H, Palancade B. Nuclear pore components affect  
711 distinct stages of intron-containing gene expression. *Nucleic Acids Res.*  
712 2015;43(8):4249-61.
- 713 31. Rahman S, Zenklusen D. Single-molecule resolution fluorescent in situ  
714 hybridization (smFISH) in the yeast *S. cerevisiae*. *Methods Mol Biol.*  
715 2013;1042:33-46.
- 716 32. Xie Y, Kerscher O, Kroetz MB, McConchie HF, Sung P, Hochstrasser M.  
717 The yeast Hex3.Slx8 heterodimer is a ubiquitin ligase stimulated by  
718 substrate sumoylation. *J Biol Chem.* 2007;282(47):34176-84.
- 719 33. Wohlschlegel JA, Johnson ES, Reed SI, Yates JR, 3rd. Global analysis  
720 of protein sumoylation in *Saccharomyces cerevisiae*. *J Biol Chem.*  
721 2004;279(44):45662-8.



- 722 34. Nixon CE, Wilcox AJ, Laney JD. Degradation of the *Saccharomyces*  
723 *cerevisiae* mating-type regulator  $\alpha 1$ : genetic dissection of cis-  
724 determinants and trans-acting pathways. *Genetics*. 2010;185(2):497-  
725 511.
- 726 35. Schweiggert J, Stevermann L, Panigada D, Kammerer D, Liakopoulos D.  
727 Regulation of a Spindle Positioning Factor at Kinetochores by SUMO-  
728 Targeted Ubiquitin Ligases. *Dev Cell*. 2016;36(4):415-27.
- 729 36. Su XA, Dion V, Gasser SM, Freudenreich CH. Regulation of  
730 recombination at yeast nuclear pores controls repair and triplet repeat  
731 stability. *Genes Dev*. 2015;29(10):1006-17.
- 732 37. Westerbeck JW, Pasupala N, Guillotte M, Szymanski E, Matson BC,  
733 Esteban C, et al. A SUMO-targeted ubiquitin ligase is involved in the  
734 degradation of the nuclear pool of the SUMO E3 ligase Siz1. *Mol Biol*  
735 *Cell*. 2014;25(1):1-16.
- 736 38. Xie Y, Rubenstein EM, Matt T, Hochstrasser M. SUMO-independent in  
737 vivo activity of a SUMO-targeted ubiquitin ligase toward a short-lived  
738 transcription factor. *Genes Dev*. 2010;24(9):893-903.
- 739 39. Zhang C, Roberts TM, Yang J, Desai R, Brown GW. Suppression of  
740 genomic instability by SLX5 and SLX8 in *Saccharomyces cerevisiae*.  
741 *DNA Repair (Amst)*. 2006;5(3):336-46.
- 742 40. Bystricky K, Van Attikum H, Montiel MD, Dion V, Gehlen L, Gasser SM.  
743 Regulation of nuclear positioning and dynamics of the silent mating type  
744 loci by the yeast Ku70/Ku80 complex. *Mol Cell Biol*. 2009;29(3):835-48.
- 745 41. Mine-Hattab J, Rothstein R. Increased chromosome mobility facilitates  
746 homology search during recombination. *Nat Cell Biol*. 2012;14(5):510-7.
- 747 42. Colombo CV, Trovesi C, Menin L, Longhese MP, Clerici M. The RNA  
748 binding protein Npl3 promotes resection of DNA double-strand breaks by  
749 regulating the levels of Exo1. *Nucleic Acids Res*. 2017;45(11):6530-45.
- 750 43. Dion V, Gasser SM. Chromatin movement in the maintenance of  
751 genome stability. *Cell*. 2013;152(6):1355-64.  
752  
753

754



755 **SUPPLEMENTAL FIGURES**

756

757 **S1 Fig: Yra1 sumoylation promotes its ubiquitination.**

758 **(A)** Yra1 is de-SUMOylated by Ulp1. Sumoylation assay in wild-type and *ulp1*  
759 temperature-sensitive (ts) mutant as described in Fig 1. One representative  
760 experiment of 3 experiments is shown.

761 **(B)** Yra1 ubiquitination increases in the *ulp1 ts* mutant. Ubiquitination assay in  
762 wild-type and *ulp1* temperature-sensitive mutant as described in Fig 1. One  
763 representative experiment of 3 experiments is shown.

764 **S2 Fig: Ubiquitination by Slx5-Slx8 does not affect Yra1 half-life. (A)** Yra1  
765 half-life is 3.8 h when using a metabolic Gal depletion assay. Protein stability  
766 assay using metabolic depletion of *GAL-HA-YRA1* in the presence of the  
767 endogenous wild-type *YRA1* gene. *YRA1* WT shuffle cells expressing HA-  
768 Yra1 from the GAL promoter on a centromeric plasmid were grown over-night  
769 in selective medium containing 2% galactose. Cells at OD=0.3 were shifted to  
770 selective medium containing 2% glucose to repress *GAL-HA-YRA1* and  
771 collected at time 0, 1h, 2h, 3h, 4h, 5h, 6h, and 7h following glucose addition.  
772 HA-Yra1 protein levels were quantified by Western blot with an  $\alpha$ HA antibody  
773 and normalized to Pgk1 with  $\alpha$ Pgk1 as loading control, using fluorescent  
774 secondary antibodies detected with the Lycopodium machine and analyzed with  
775 LITE software. The average of 2 independent experiments is shown. **(B), (C)**  
776 Yra1 stability does not change in the absence of E3 ligases. Protein stability  
777 assay using metabolic depletion of *GAL-HA-YRA1* in the *YRA1* WT shuffle  
778 background combined with  $\Delta$ *slx5*,  $\Delta$ *slx8*,  $\Delta$ *tom1* and  $\Delta$ *slx8* $\Delta$ *tom1*. Western  
779 Blot analysis (B) and relative quantification (C) were performed as described  
780 in (A). The average of 3 independent experiments (N3) is shown for the  $\Delta$ *slx5*,  
781  $\Delta$ *slx8*,  $\Delta$ *tom1* and  $\Delta$ *slx8* $\Delta$ *tom1* strains. Two way ANOVA statistical test with  
782 multiple comparisons did not show any statistically significant difference (n.s)  
783 between different yeast strains in the same time points.

784 **S3 Fig: The  $\Delta slx5$ ,  $\Delta slx8$  and *yra1* mutants show no mRNA export defect**  
785 **by FISH analysis. (A)** Fluorescent in situ hybridization (FISH) analysis of  
786 poly(A)+ RNA localization using oligo(dT) probes in shuffled *HA-YRA1 WT* in  
787 WT,  $\Delta tom1$ ,  $\Delta slx8$ ,  $\Delta slx5$ ,  $\Delta slx8\Delta tom1$ ,  $\Delta slx5\Delta tom1$  background and *mex67-5*  
788 cells as control for mRNA export defect. The percent of cells showing poly(A)+  
789 RNA accumulation in the nucleus is indicated in each panel. DAPI stains the  
790 cell nucleus. **(B)** Fluorescent *in situ* hybridization (FISH) analysis of poly(A)+  
791 RNA localization using oligo(dT) probes in integrated *HA-YRA1 WT*, *HA-*  
792 *yra1(1-210)*, *HA-yra1allKR* and *mex67-5* cells. Cells were grown exponentially  
793 in YEPD 2% Glu at 25°C. *mex67-5* ts mutant was grown for an additional 1h  
794 at 37°C. One representative image of nuclear staining (DAPI), oligo-dT Cy3  
795 (poly(A)+ RNA), and Transmission Light with merged channels is shown for  
796 each strain analyzed. The percent of cells showing poly(A)+ RNA  
797 accumulation in the nucleus is shown in each panel.

798 **S4 Fig: Gal-induced HO-mediated irreparable and reparable DSB**  
799 **systems. (A)** Scheme showing the Gal-induced HO-mediated irreparable  
800 DSB described in (27). The HO endonuclease is expressed in the presence of  
801 Galactose, inducing the HO cut at the Mat locus that cannot be repaired  
802 because of the deletion of *HML* and *HMR*. **(B)** Scheme showing the Gal-  
803 induced HO-mediated reparable DSB described in (28). The HO  
804 endonuclease is expressed in the presence of Galactose, inducing the HO cut  
805 at the KanMx cassette next to the URA3 locus. The repair of the DSB at the  
806 HO cut is possible by HR thanks to the KanMX cassette at the LYS2 locus. If  
807 this occurs, the repair will result in an HO insensitive KanMX cassette at the  
808 URA3 locus as well as the loss of the short unique sequence surrounding the  
809 initial HO cut site.  
810

811 **S5 Fig: Growth phenotypes and protein levels in the irreparable HO-cut**  
812 ***HA-YRA1 WT* and *HA-yra1* mutant strains (A)** Spot test analysis on plates  
813 containing SCLGg Glu 2% and SCLGg Gal 2% of confluent cultures of  
814 integrated *HA-YRA1 WT* and *HA-yra1* mutants containing the HO irreparable  
815 DSB. A *YRA1 WT* strain without any galactose-inducible irreparable HO cut is  
816 shown as control. **(B)** Protein levels of HA-Yra1 WT, HA-yra1(1-210) and HA-  
817 yra1allKR expressed from copies integrated into the GA-6844 strain (25) after  
818 2h in Glucose or Galactose to induce the irreparable HO cut. Yra1 proteins  
819 were detected with an  $\alpha$ HA antibody and values normalized to Pgk1 protein  
820 levels. The levels of WT or mutant HA-Yra1 proteins remain quite constant  
821 between the different time points Glu 2h, Gal (0.5h, 1h, 2h). Values of HA-  
822 Yra1/Pgk1 are shown below the blot. One representative Western Blot is  
823 shown. **(C)** Quantification of the Western blot. The average of 3 independent  
824 experiments is shown with corresponding standard error of the mean. HA-  
825 Yra1 protein levels were normalized to HA-Yra1 WT in Glu 2h set to 1.  
826

827 **S6 Fig: Yra1 mutants have comparable HO cut efficiency in the**  
828 **irreparable and repairable systems. (A)** Analysis of HO cut site levels in the  
829 GA6844 strain described in (25) after 0.5h, 1h, 2h and 4h of HO  
830 endonuclease induction with galactose. The genomic locus was quantified by  
831 qPCR (with oligos OFS2682 + OFS2683) and the level was normalized to  
832 *SCR1*. The average of 6 independent experiments is shown with  
833 corresponding standard error of the mean. **(B)** Analysis of HO cut site levels  
834 in the *HA-YRA1 WT* and *HA-yra1* mutants integrated in GA6844 strain  
835 described in (25) after 2h of HO endonuclease induction with galactose or 2h  
836 in Glucose (no HO induction). The genomic locus was quantified by qPCR  
837 (with oligos OFS2682 + OFS2683) and the level was normalized to *SCR1*.  
838 The average of 3 independent experiments is shown with corresponding  
839 standard error of the mean. **(C)** Analysis of HO cut site levels in *HA-YRA1 WT*  
840 (*WT*), *HA-yra1(1-210)*, *HA-yra1allKR* and No-Tag strains treated with  
841 Galactose 2% (cut induction) or not (control) for 2h. The genomic locus was  
842 quantified by qPCR using oligos next to the HO site (OFS4188-OFS4179) and  
843 the level was normalized to *SCR1*. The HO cut levels in galactose are  
844 expressed relative to those in glucose. The average of 2 independent  
845 experiments is shown with corresponding standard error of the mean.

846

847 **S7 Fig: Levels of Rad51 in *HA-YRA1 WT* and *HA-yra1* mutant strains.**  
848 Protein levels of Yra1 ( $\alpha$ HA), Pkg1 ( $\alpha$ Pkg1), Rad51 ( $\alpha$ Rad51) in *HA-YRA1*  
849 *WT*, *HA-yra1(1-210)* and *HA-yra1allKR* analyzed by Western blot. The right  
850 graph shows the Western blot quantification of the ratio of Rad51/Pkg1 of  
851 three independent experiments with relative standard error of the mean.

852 The quantifications were performed using Lycor Software. Rad51 protein  
853 levels were normalized to those in *HA-YRA1 WT* that were set to 1.

**A**

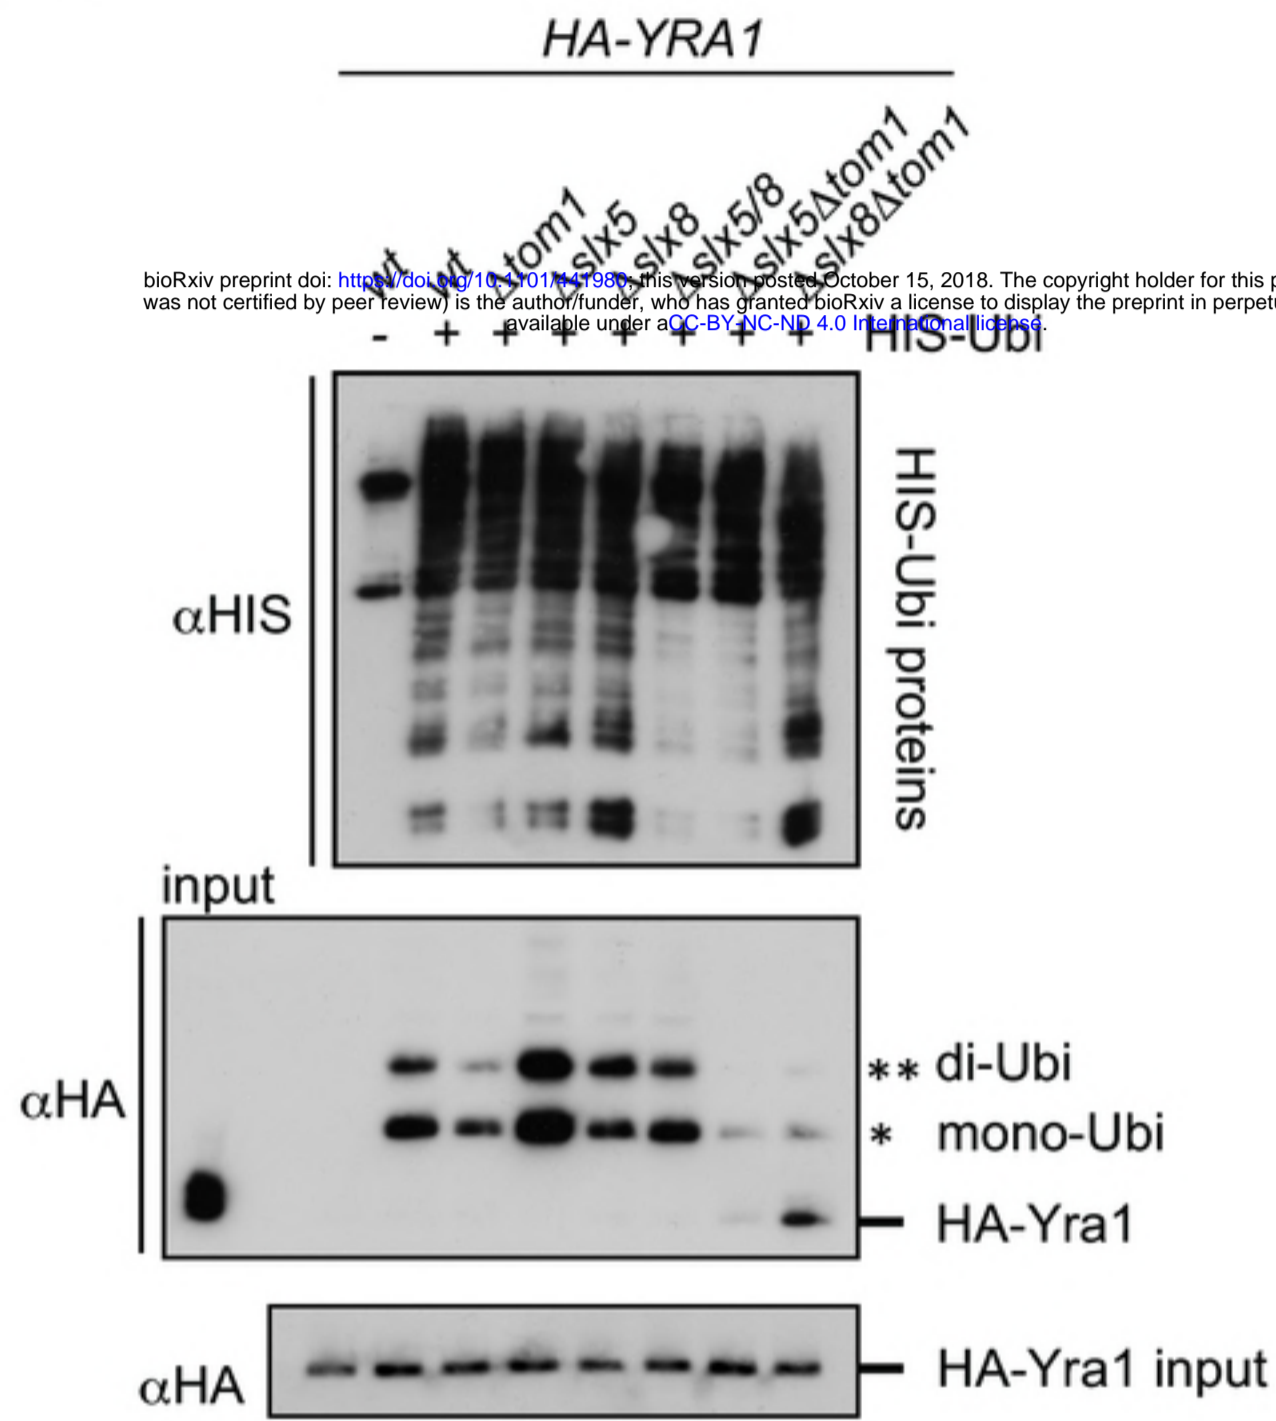

**B**

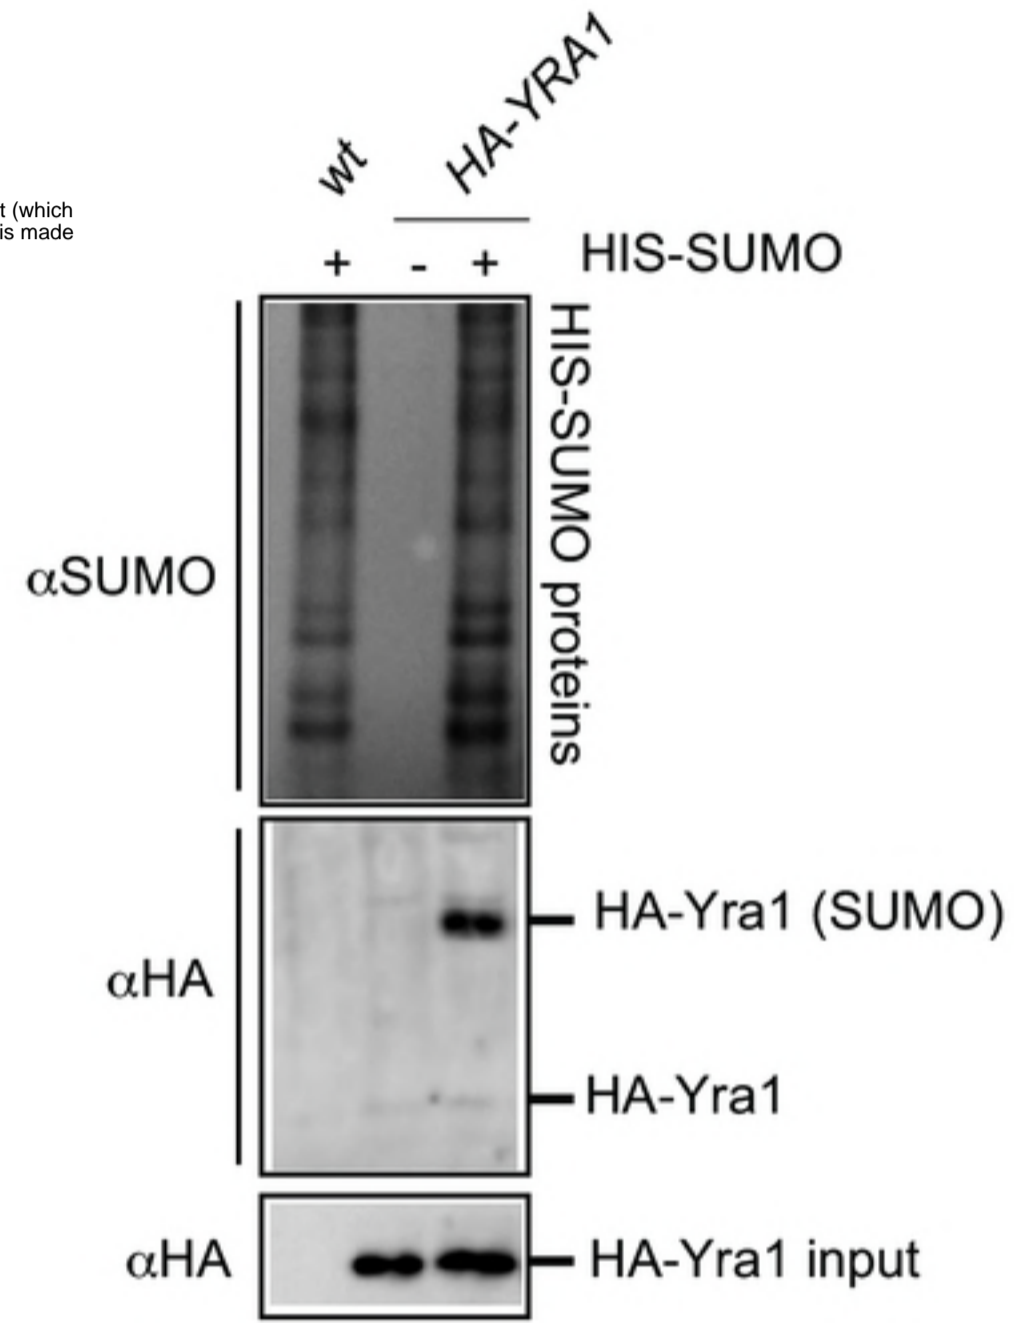

**C**

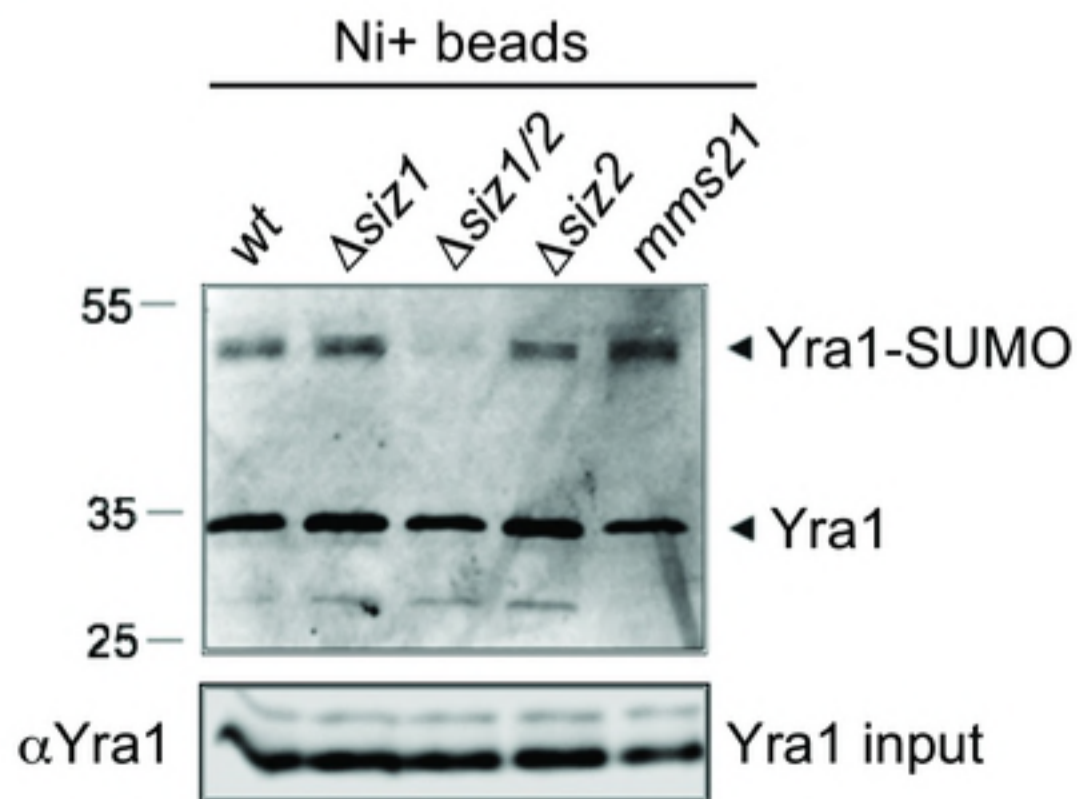



A

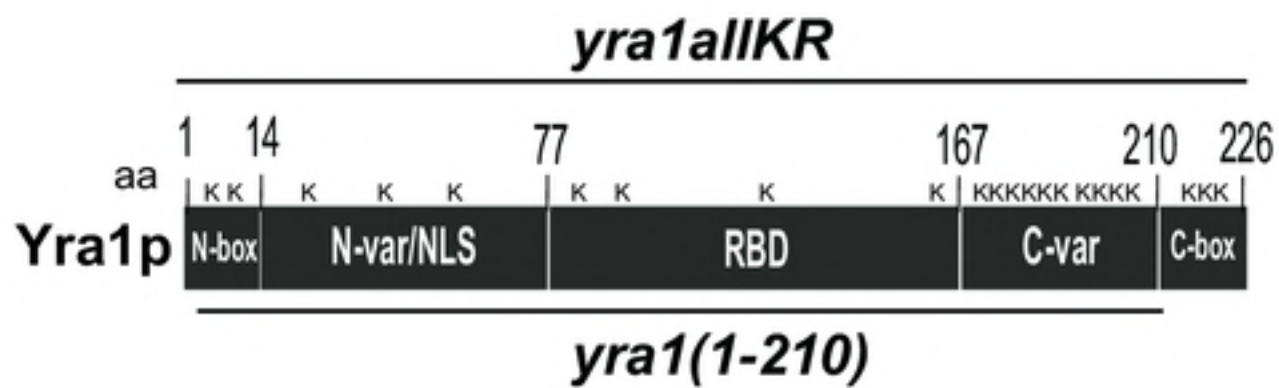

B

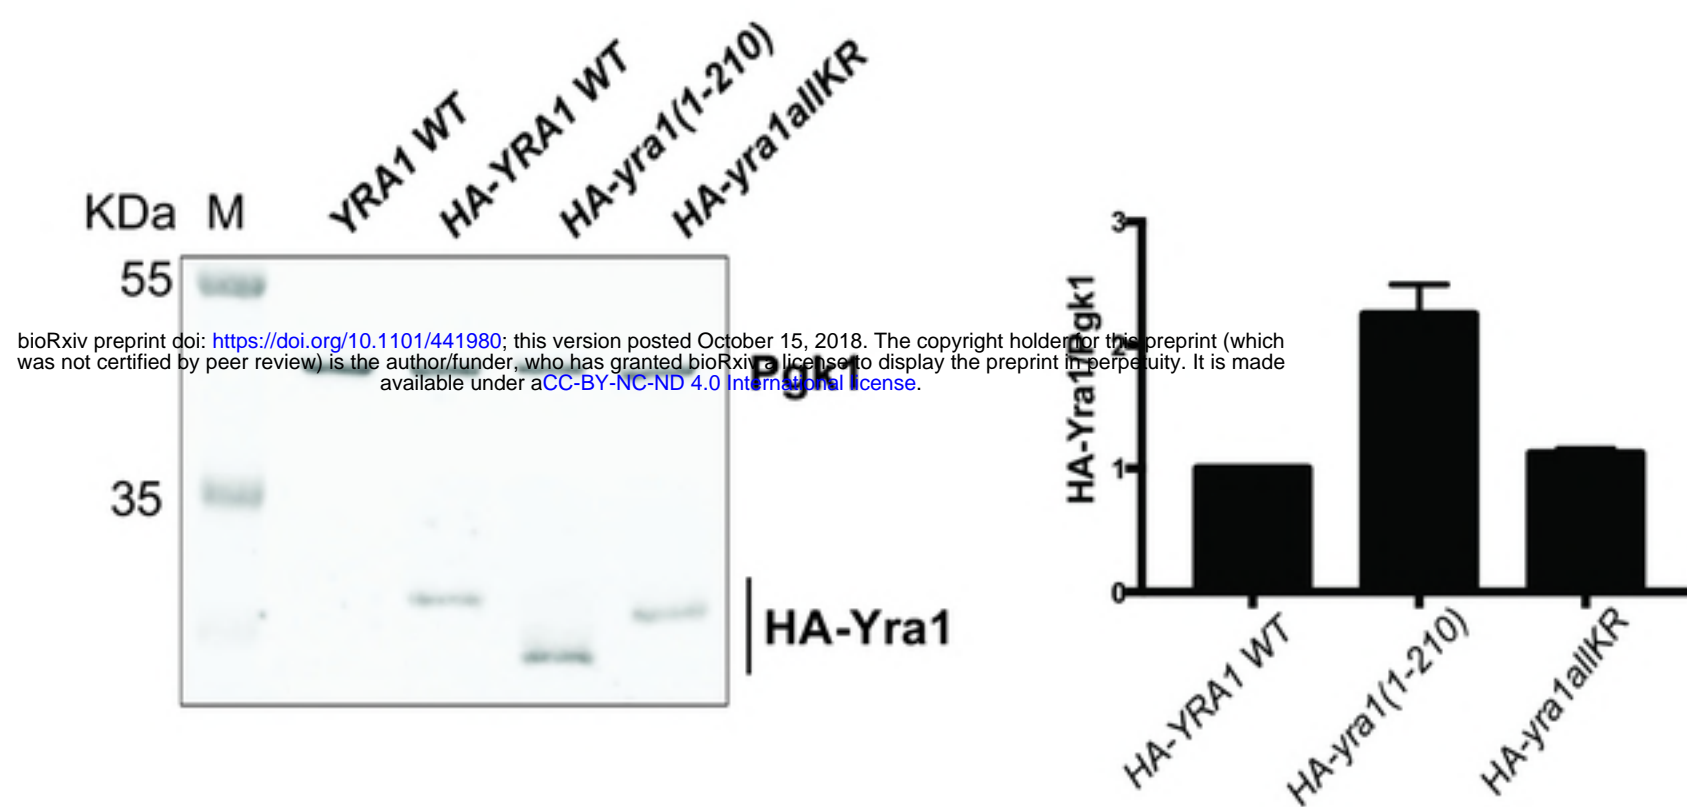

C

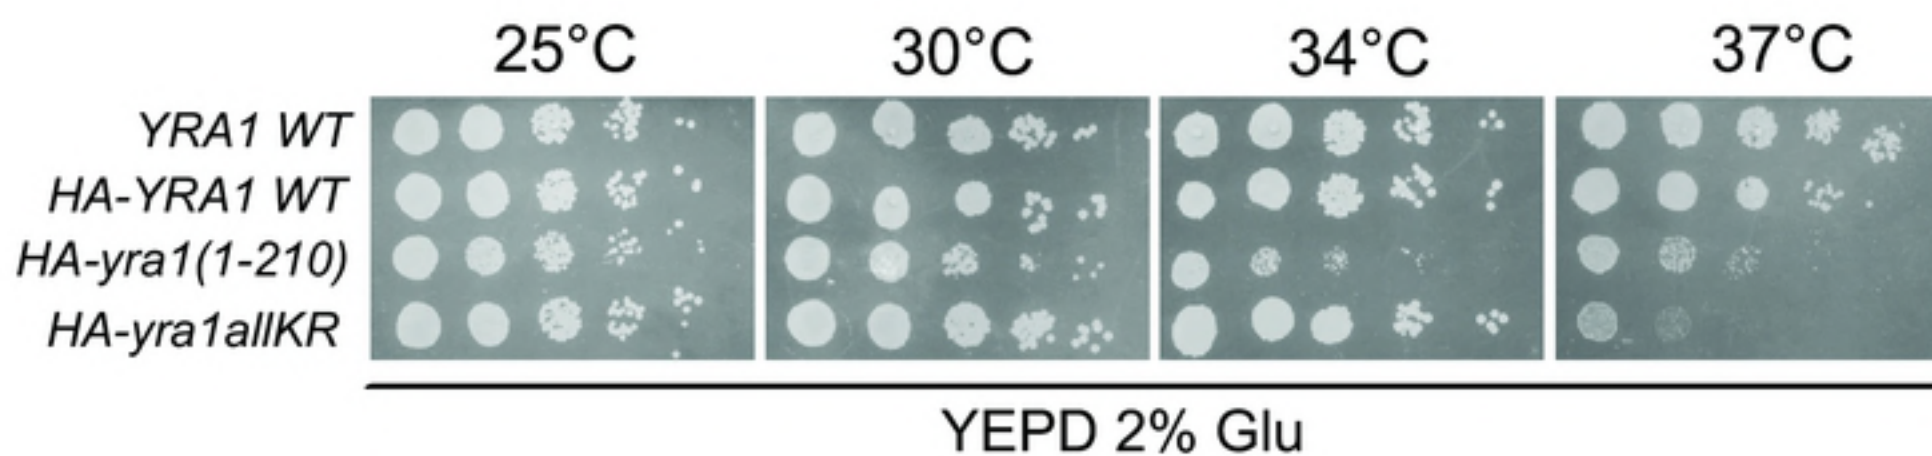

D

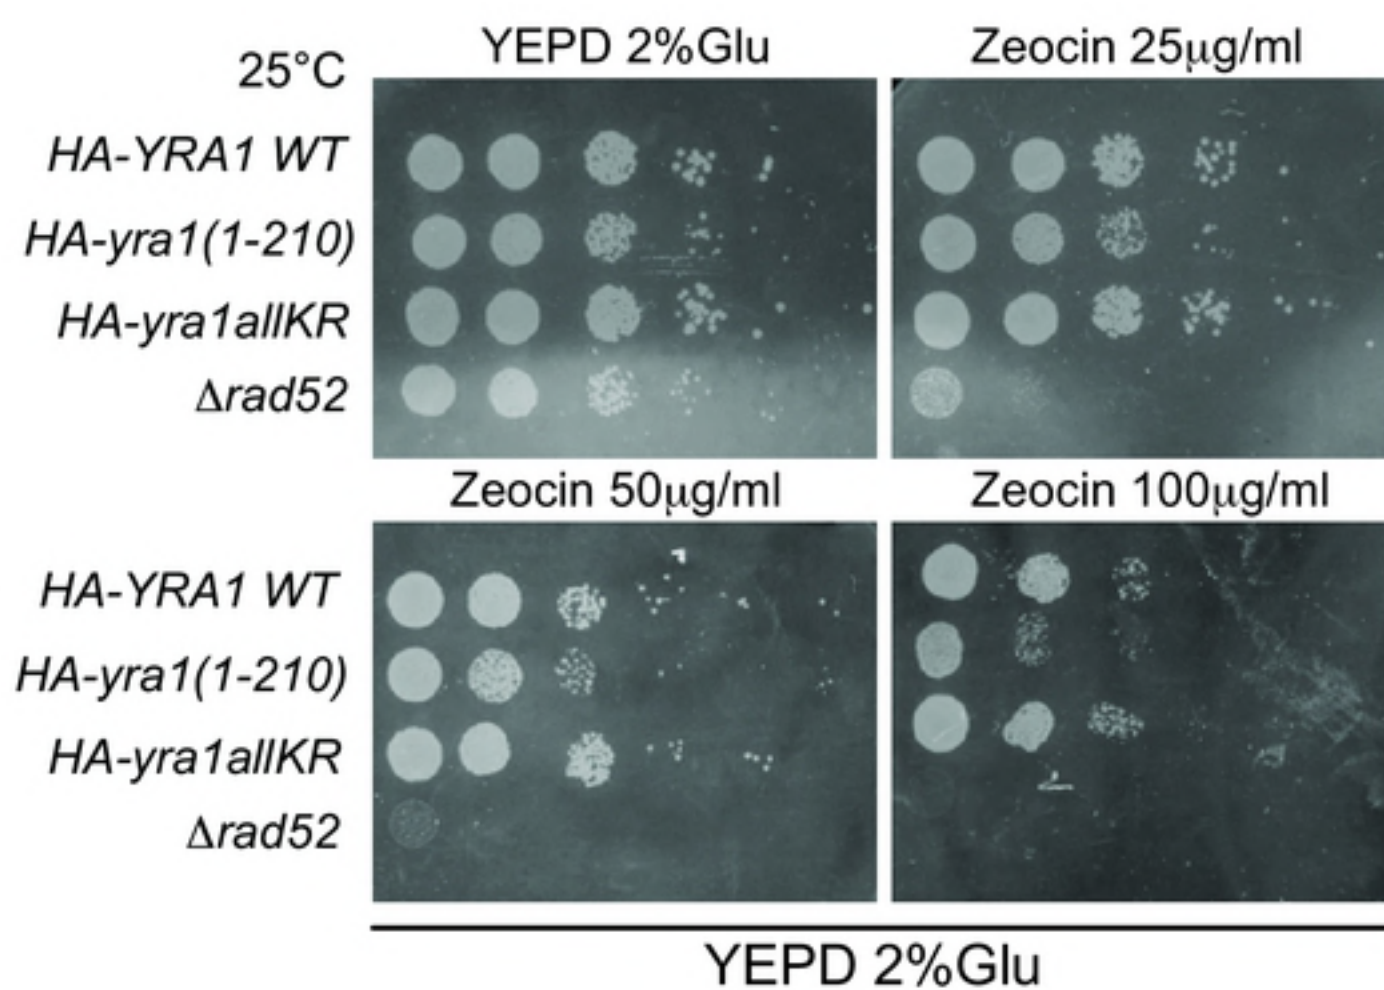

A

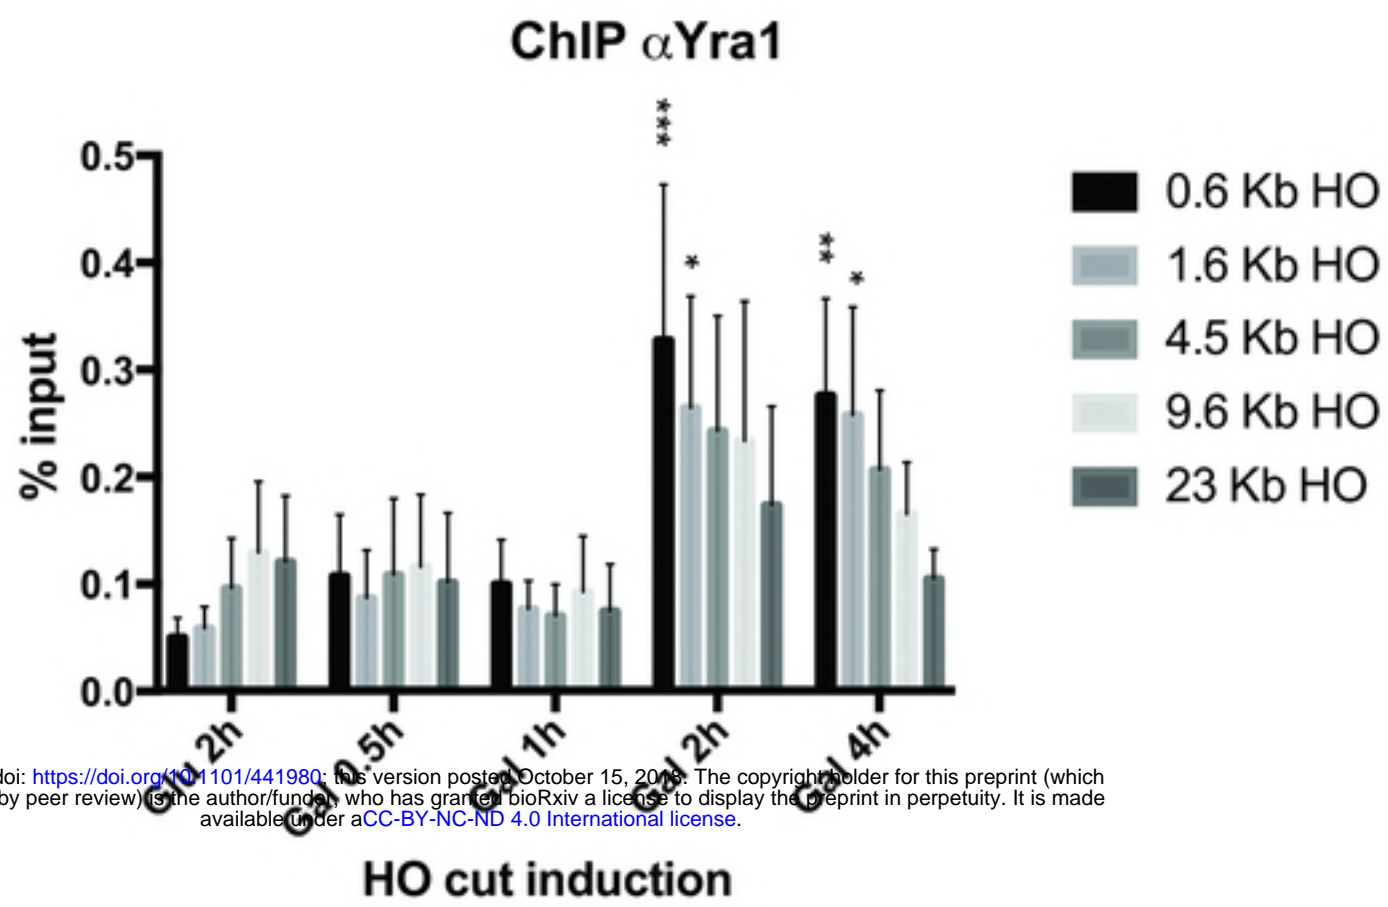

B

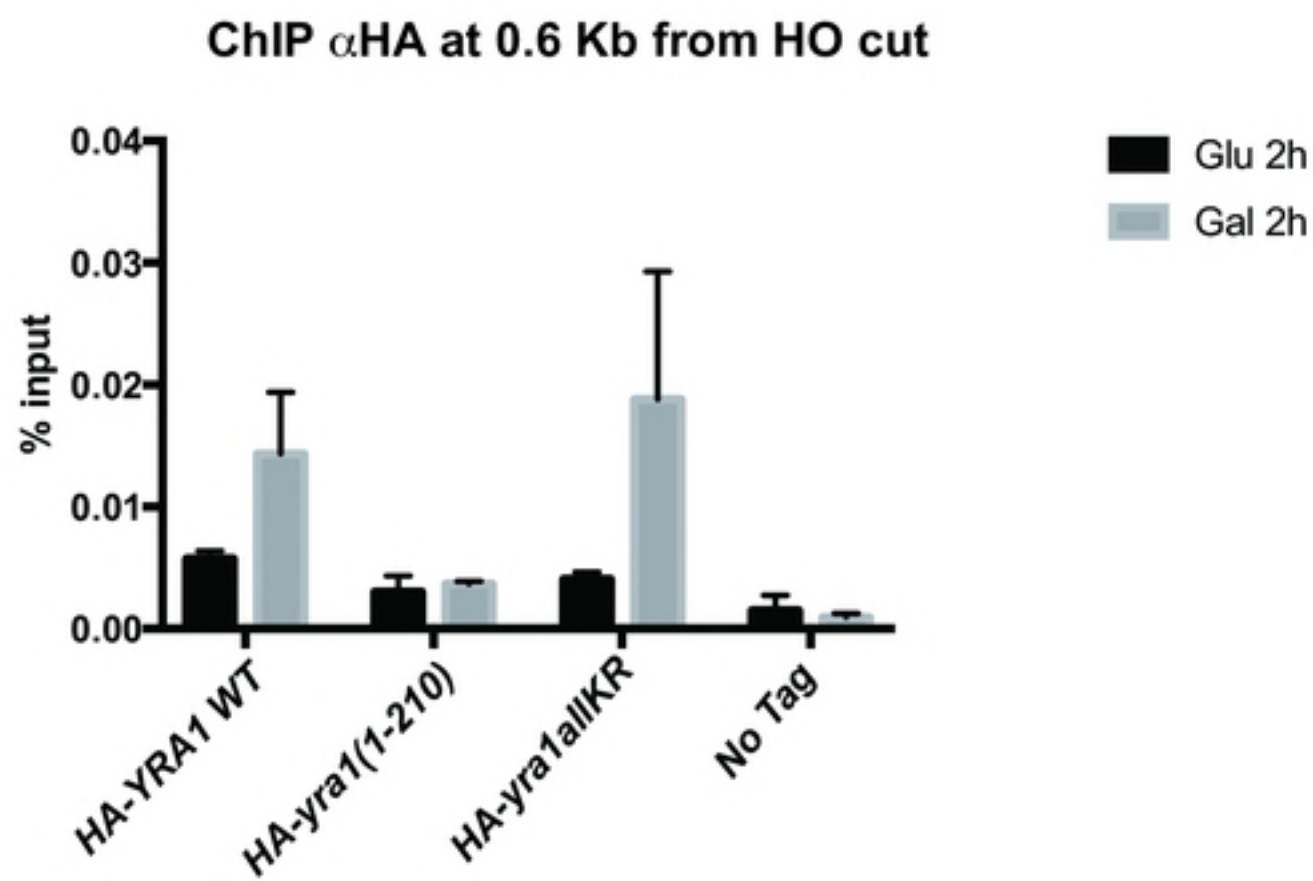

C

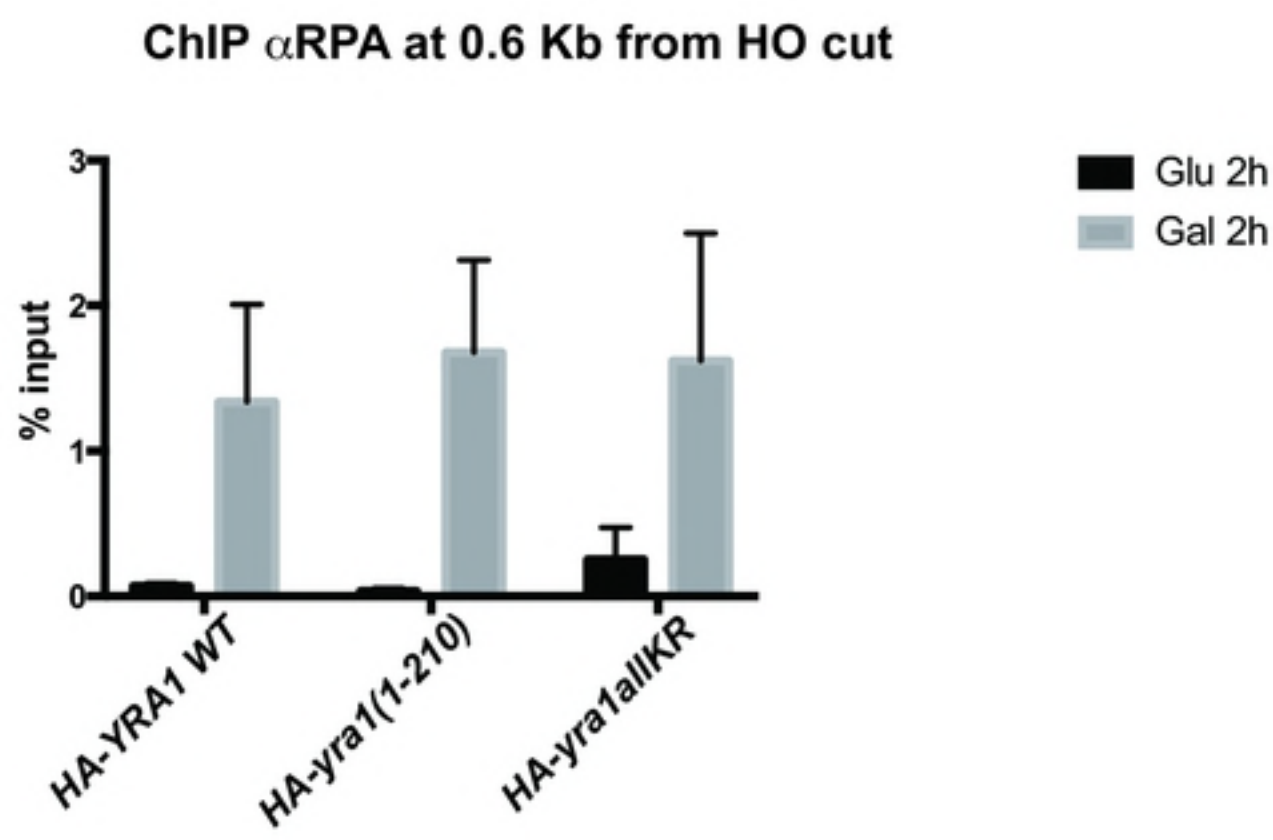

bioRxiv preprint doi: <https://doi.org/10.1101/441980>; this version posted October 15, 2018. The copyright holder for this preprint (which was not certified by peer review) is the author/funder, who has granted bioRxiv a license to display the preprint in perpetuity. It is made available under aCC-BY-NC-ND 4.0 International license.

## A

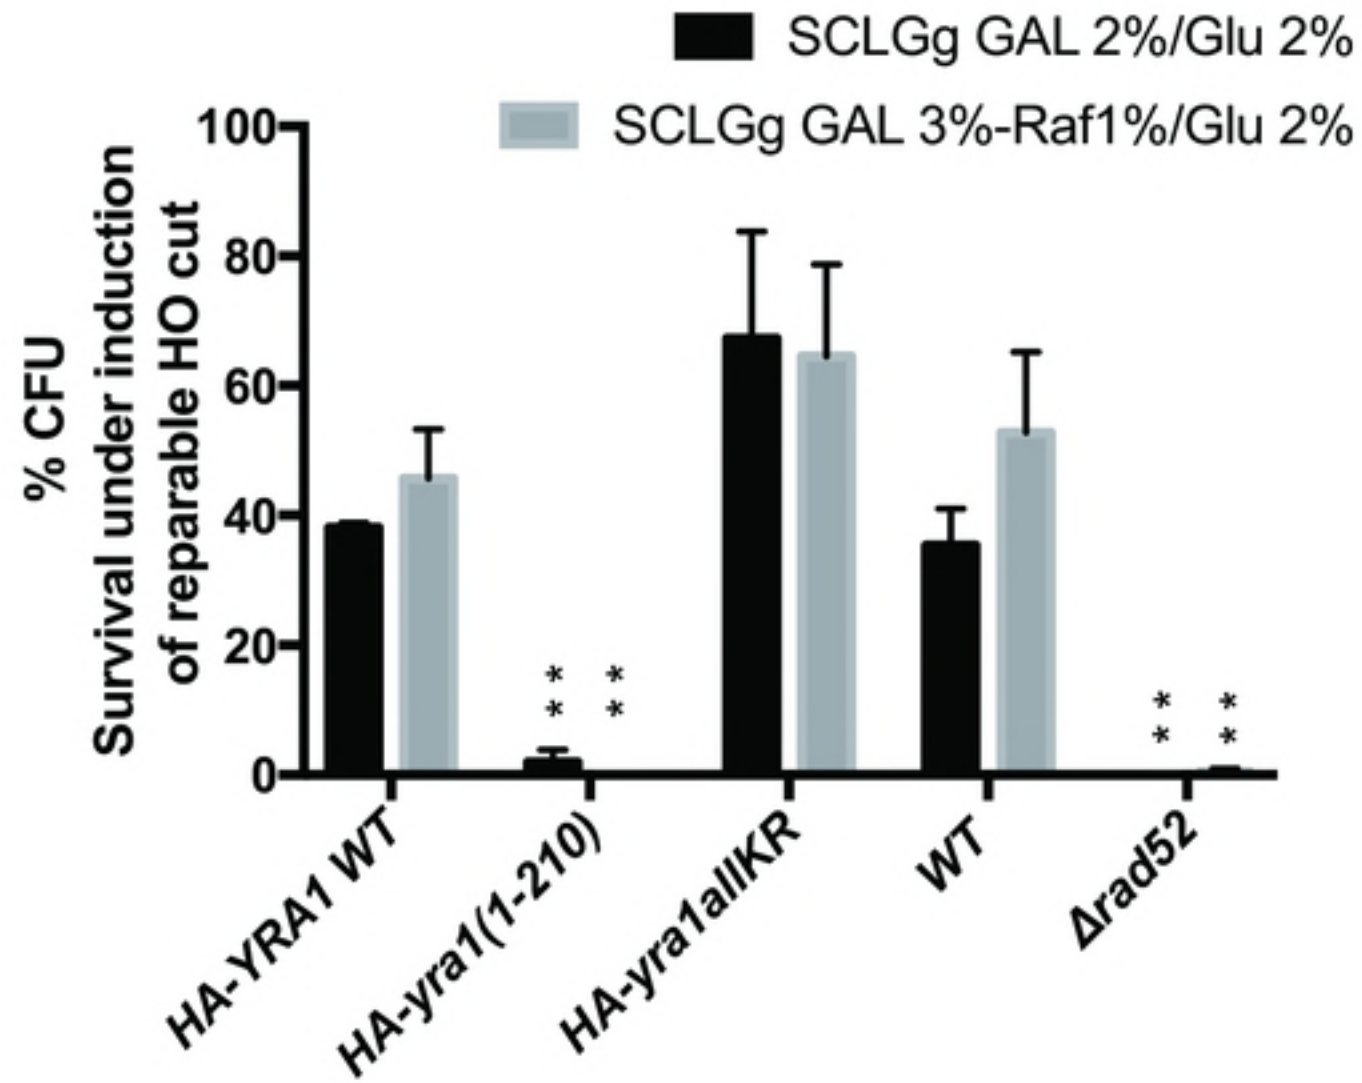

## B

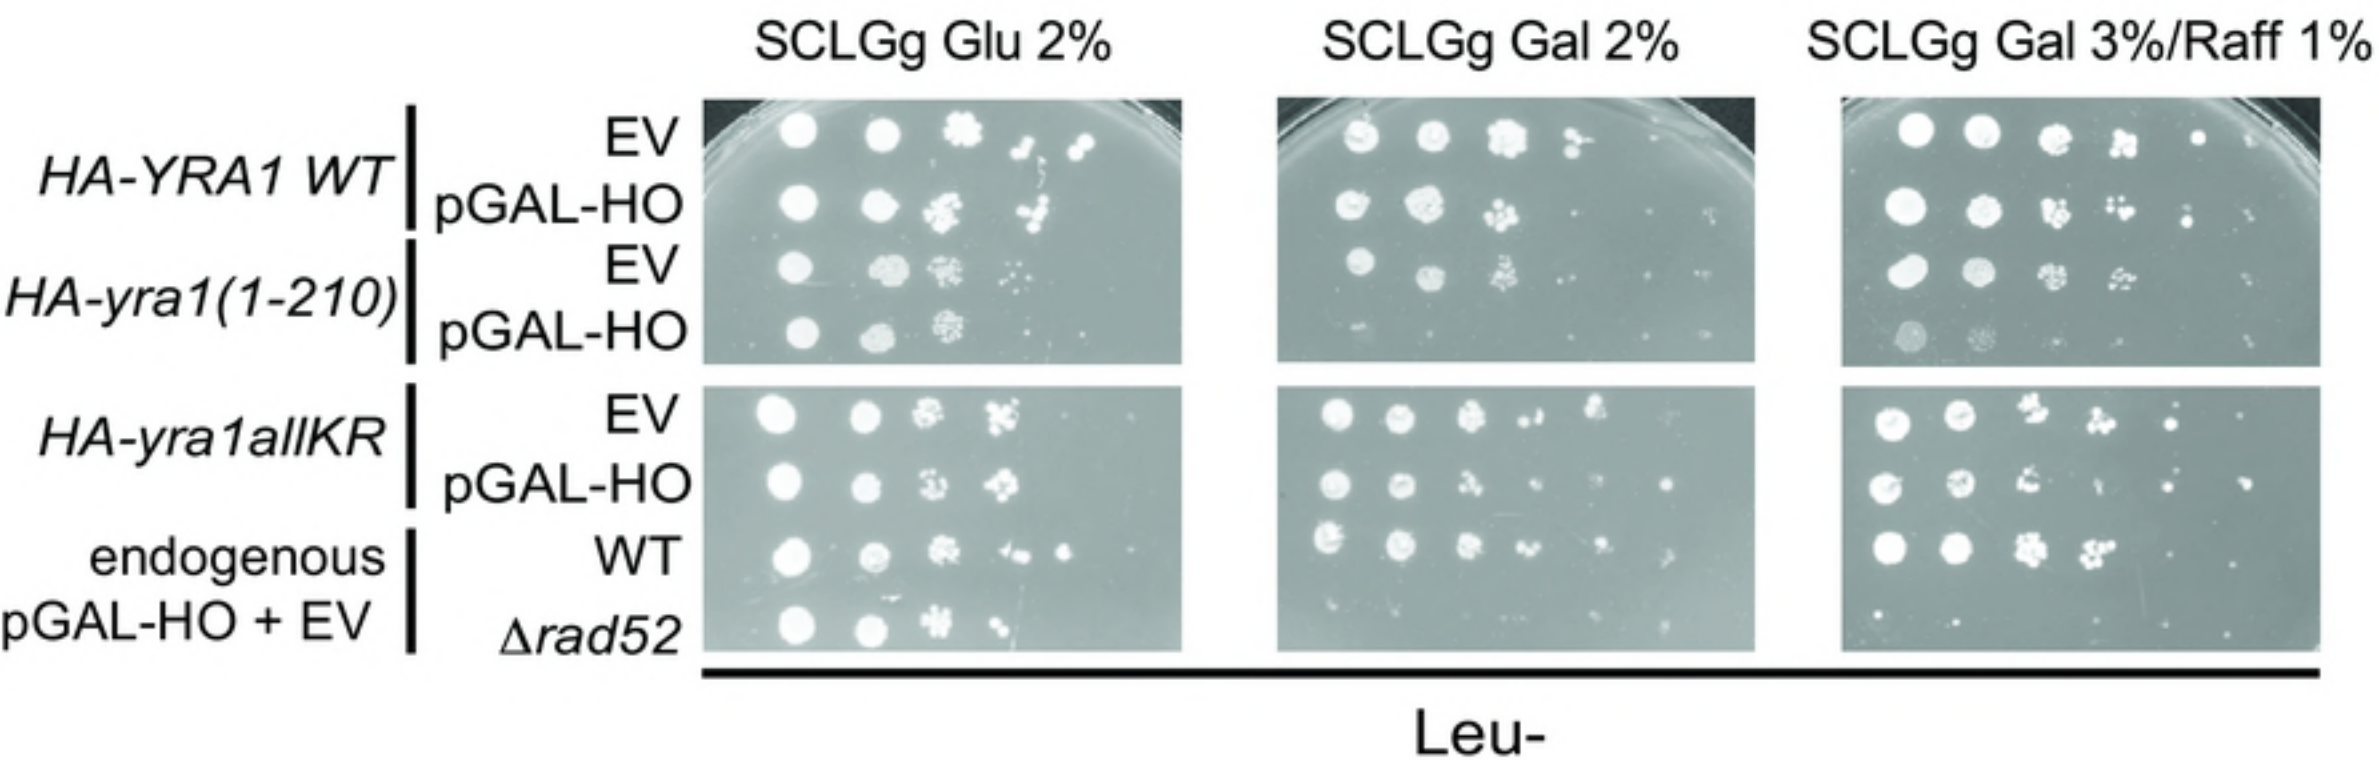

A

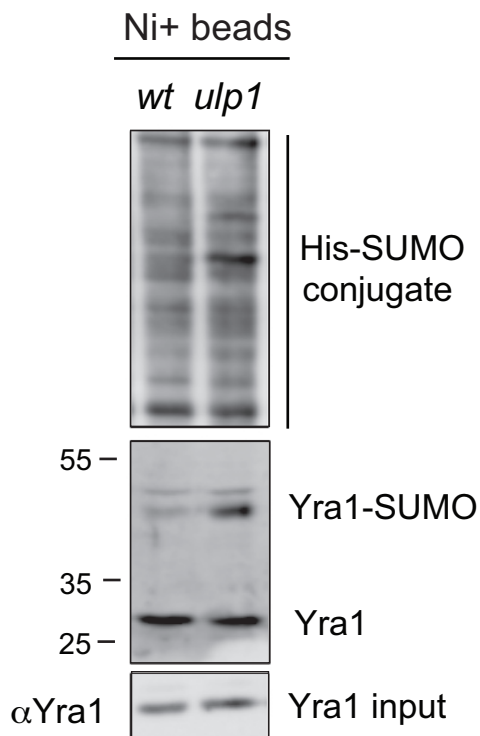

B

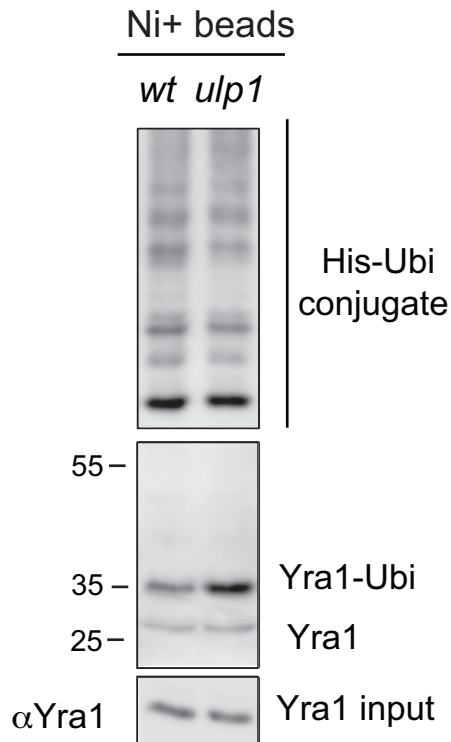



A

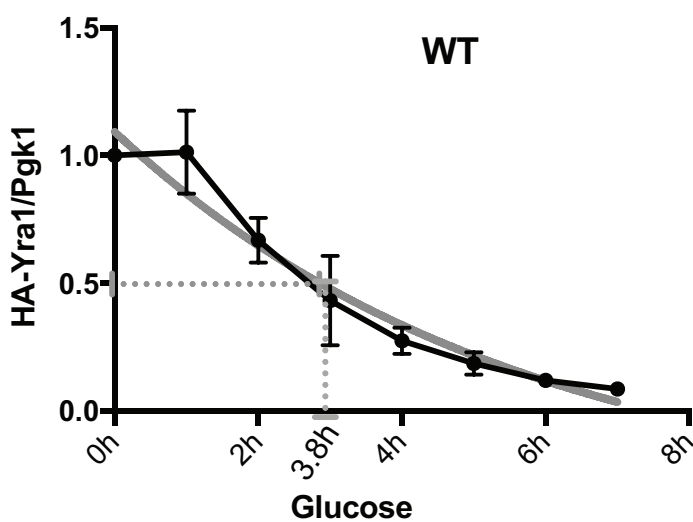

B

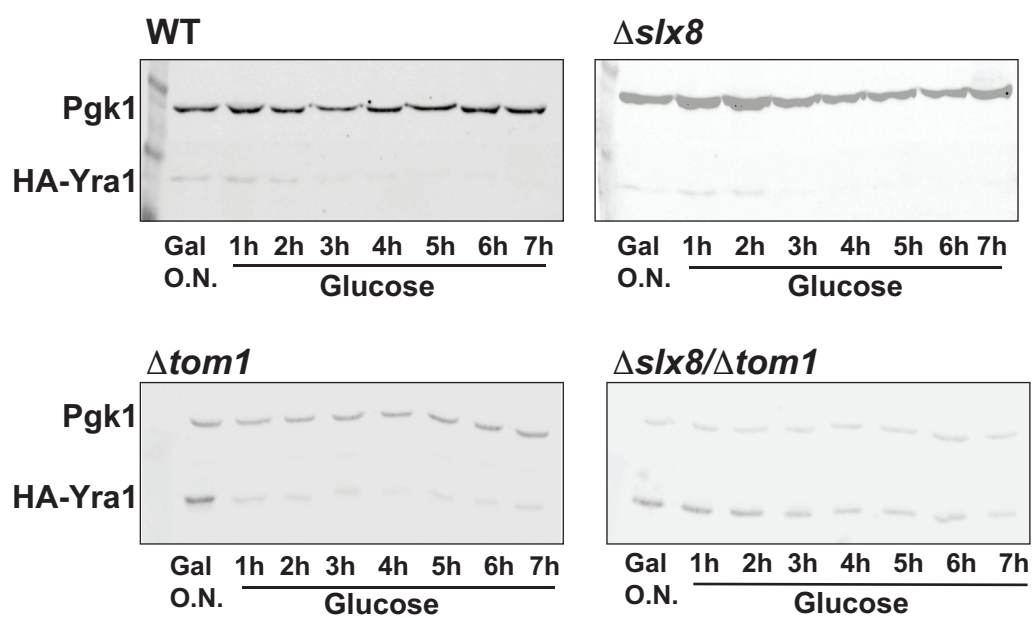

C

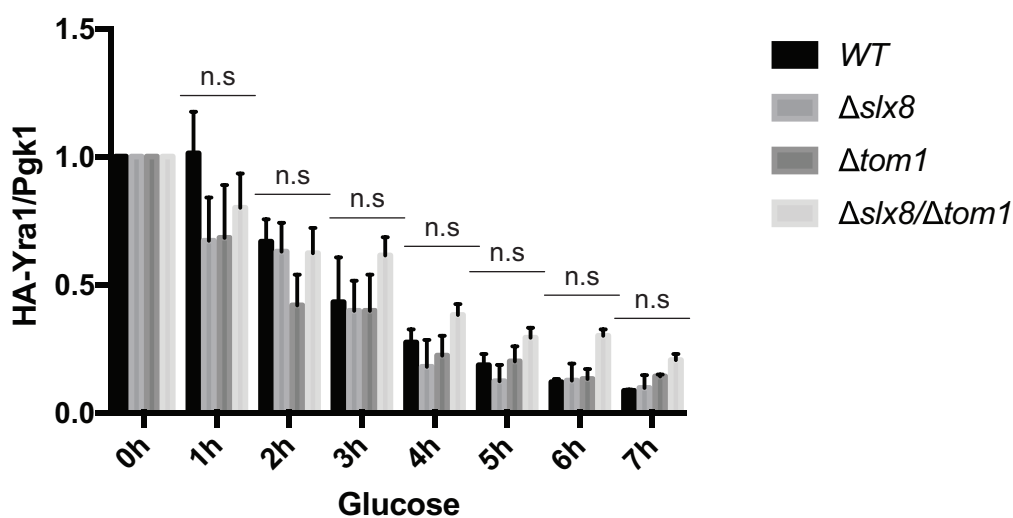

S3 Fig

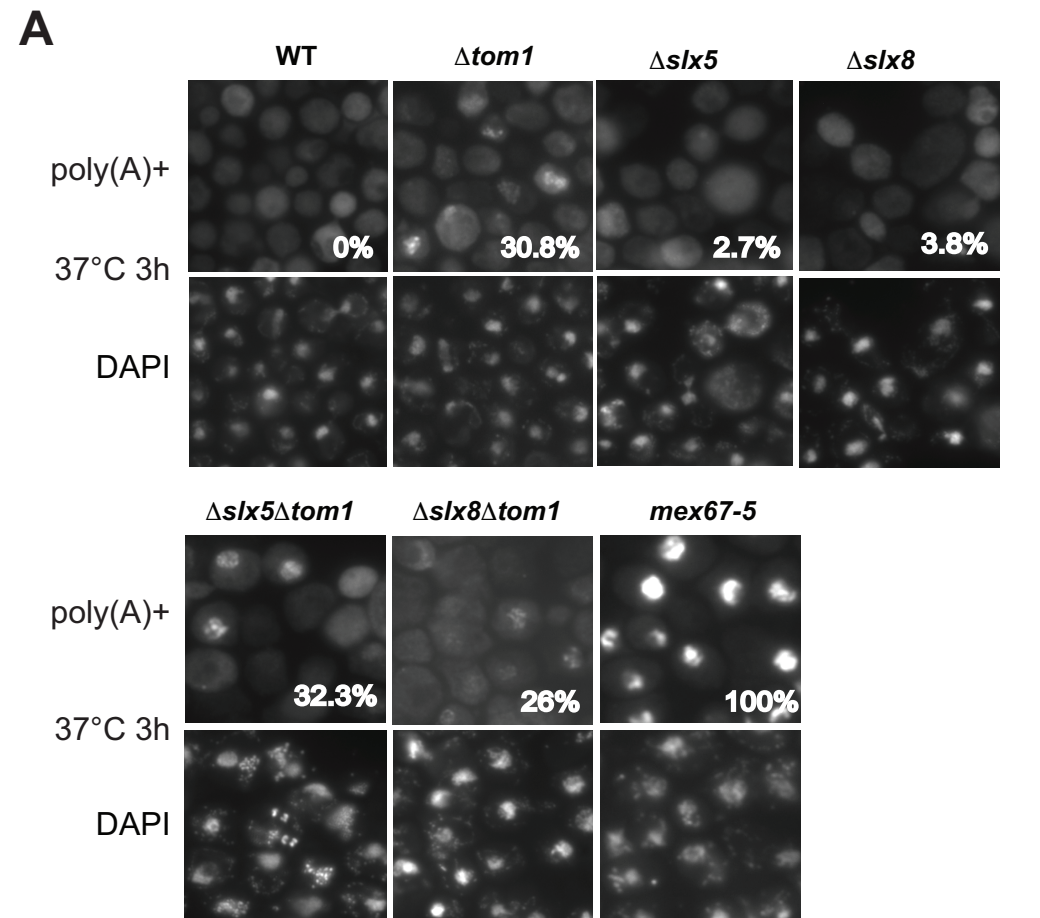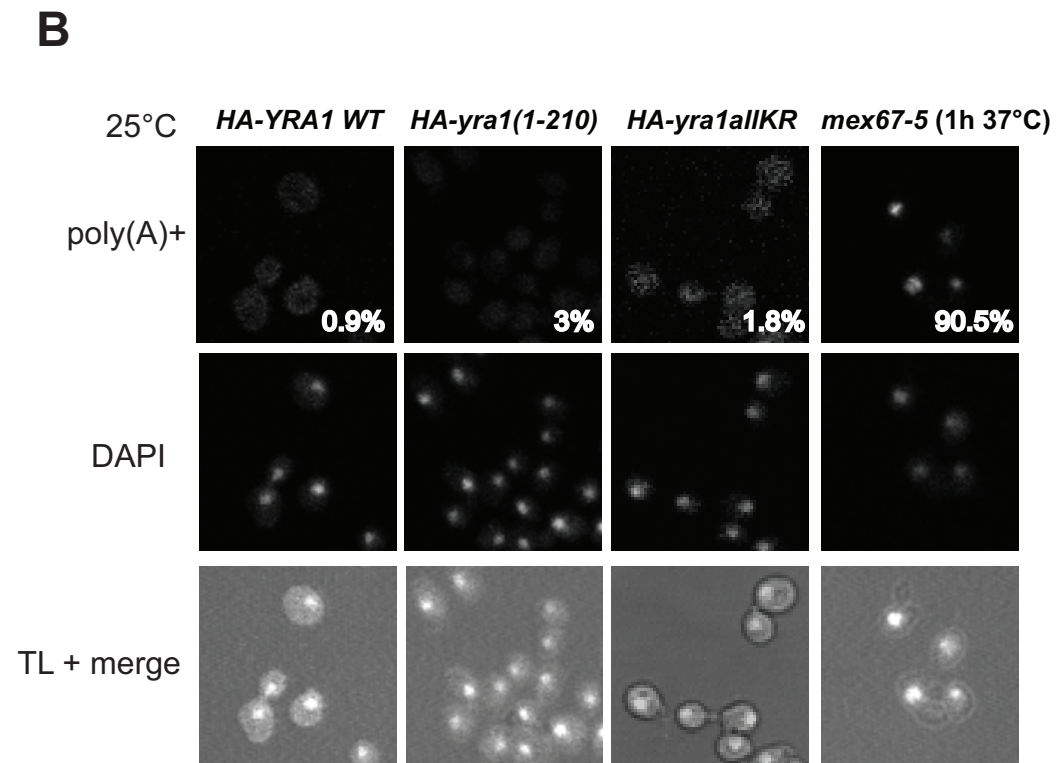

### A Gal-induced HO-mediated irreparable DSB

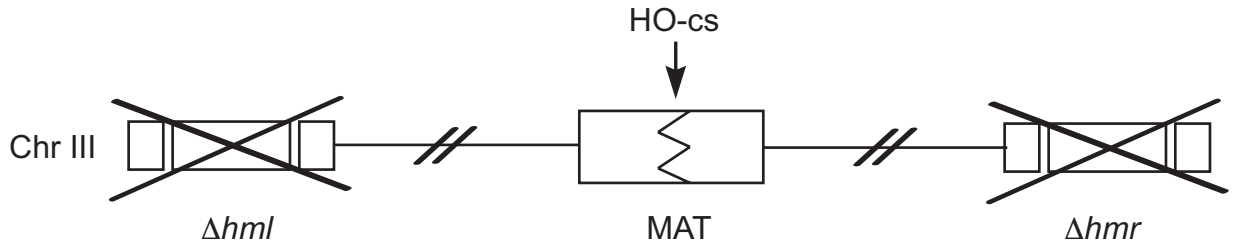

### B Gal-induced HO-mediated repairable DSB

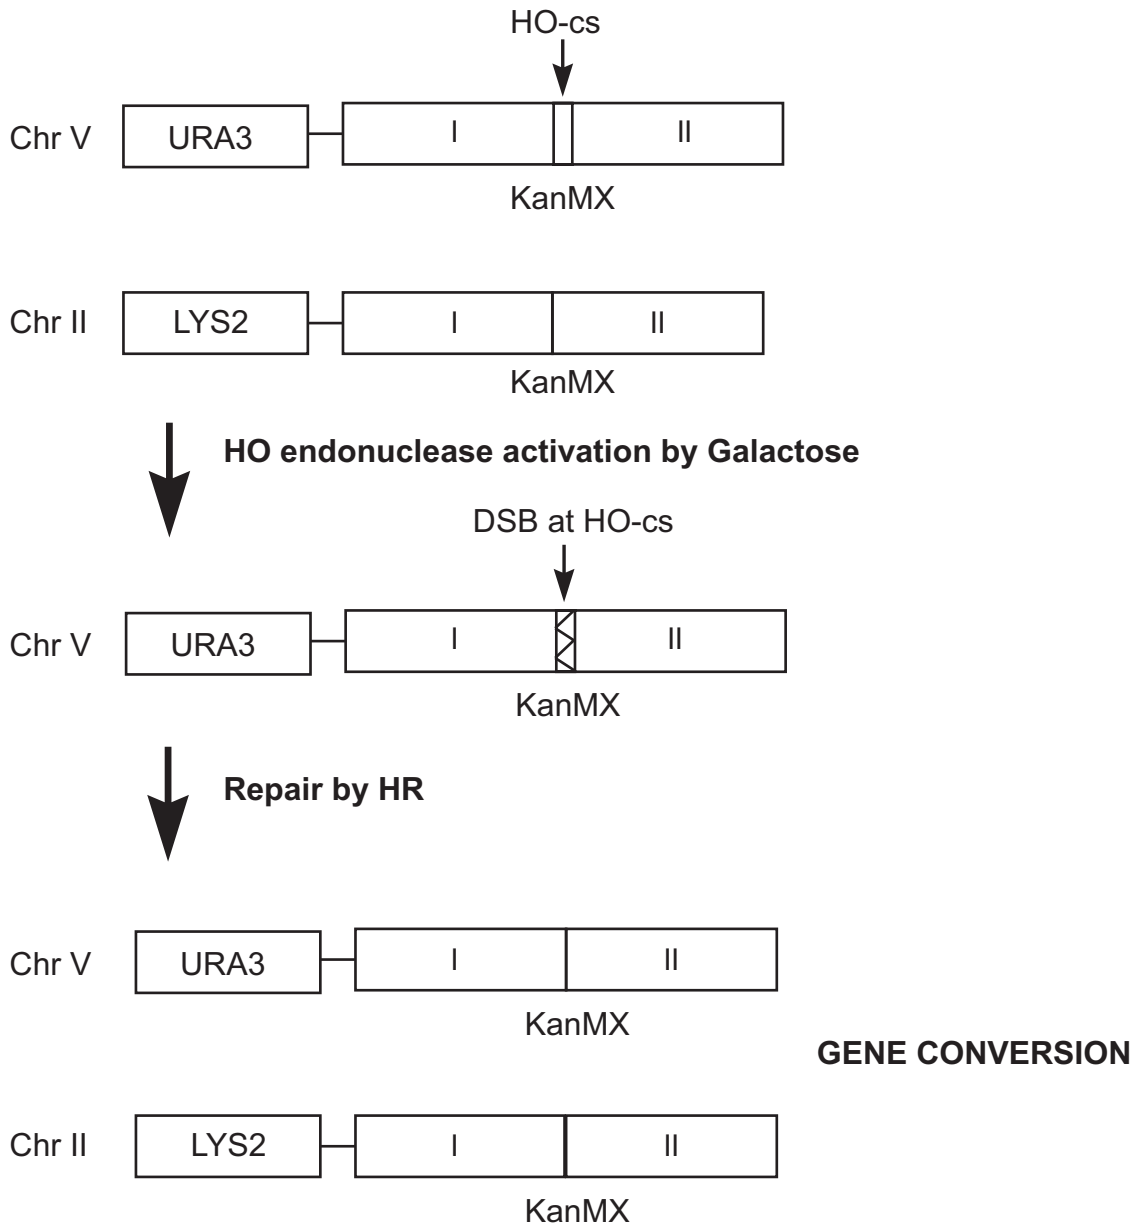

A

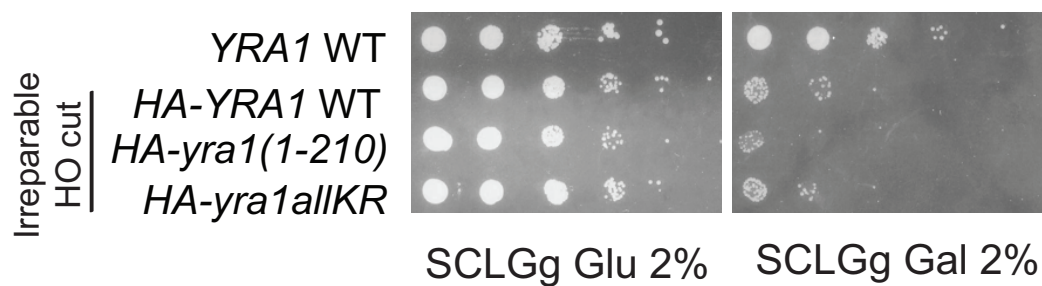

B

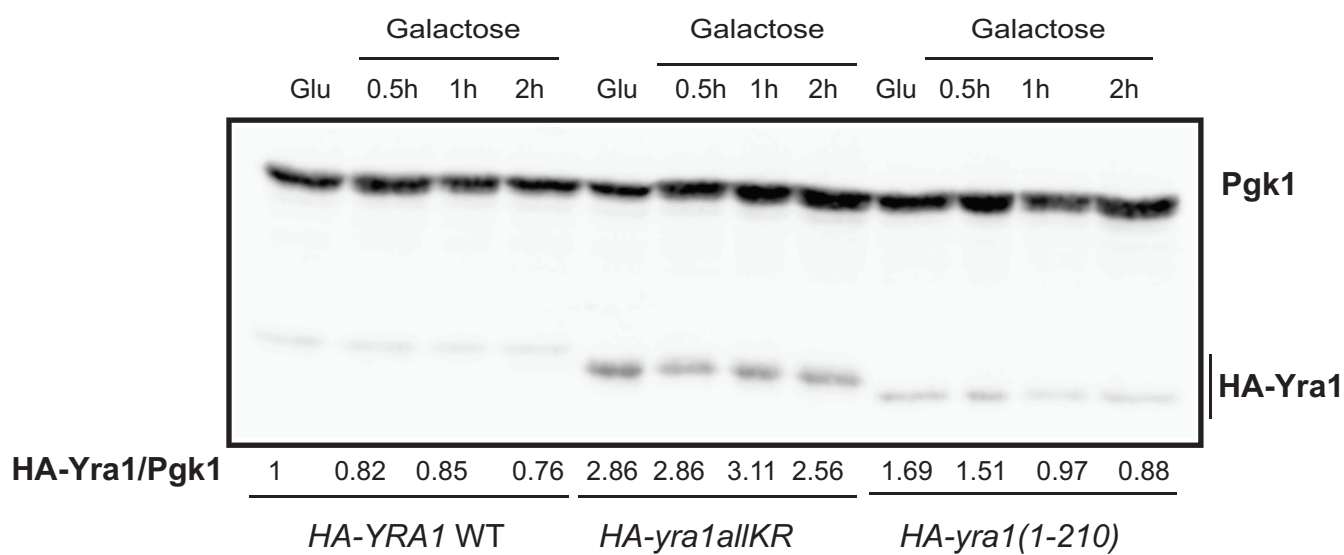

C

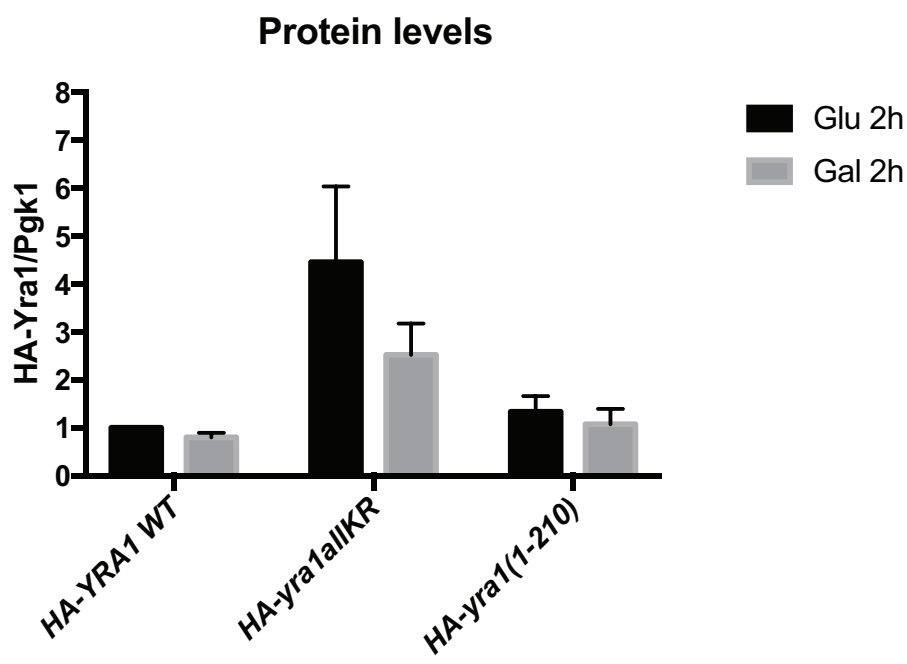



**A** qPCR analysis of HO cut efficiency in the irreparable system (related to ChIP  $\alpha$ Yra1 in Fig. 3A)

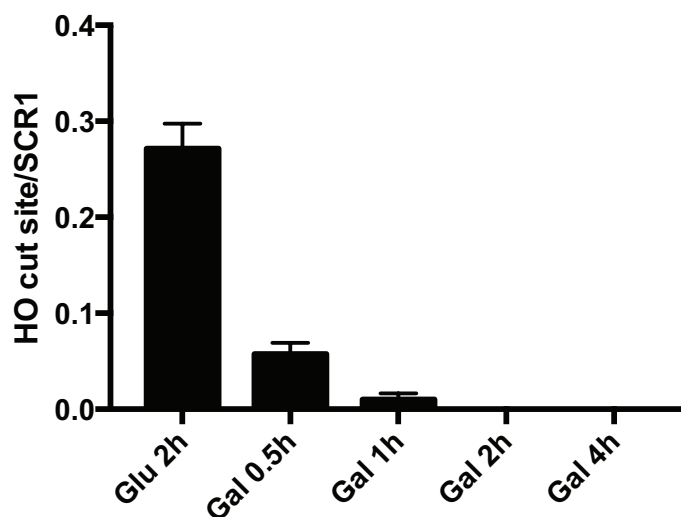

**B** qPCR analysis of HO cut efficiency in the irreparable system (related to ChIP  $\alpha$ HA in Fig. 3B)

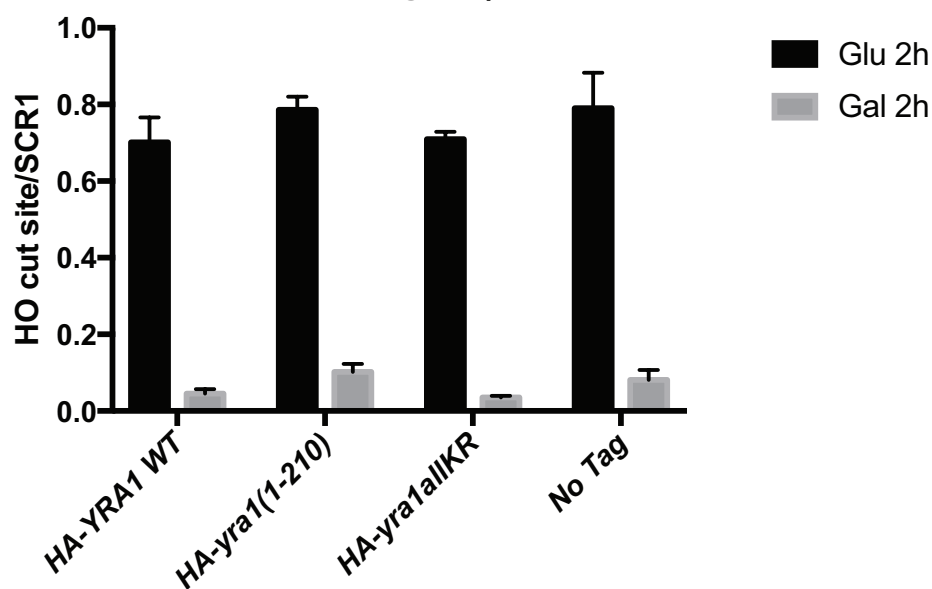

**C** qPCR analysis of HO cut efficiency in the reparable system

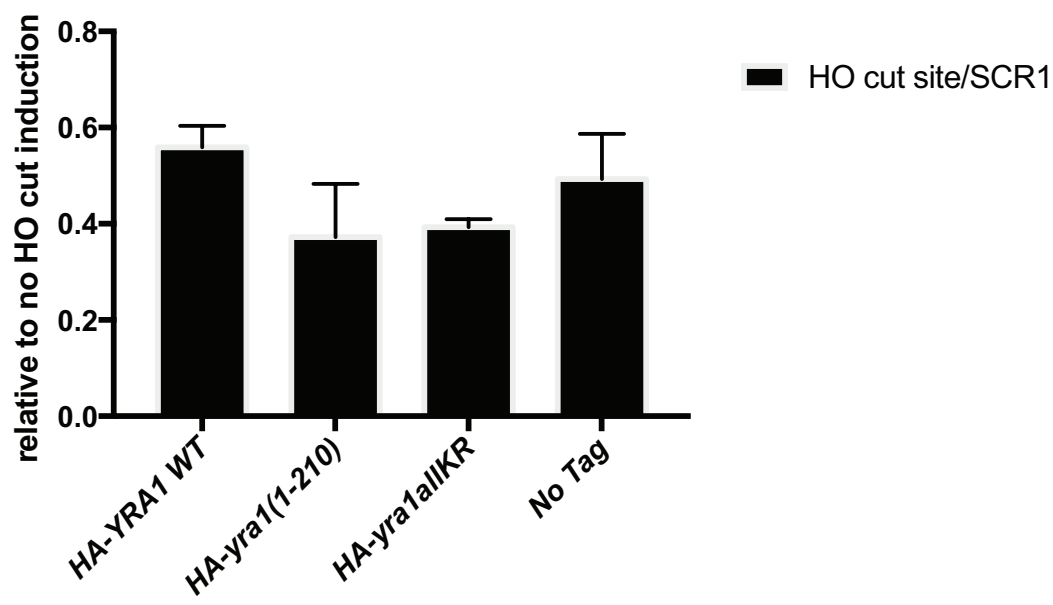

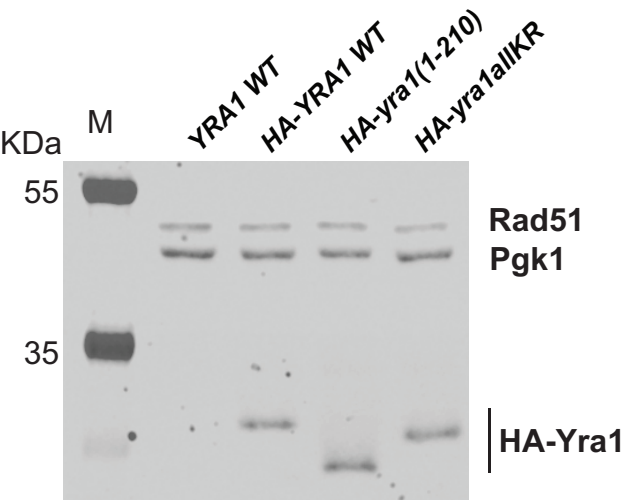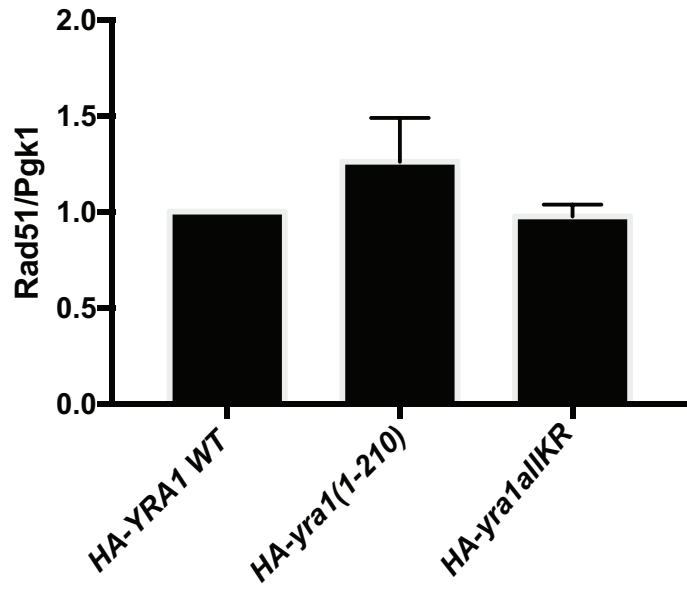

## S1 Table: Strains used in this study

| Strains  | Name                                        | Genotype                                                                                                                                                               | Reference               |
|----------|---------------------------------------------|------------------------------------------------------------------------------------------------------------------------------------------------------------------------|-------------------------|
| FSY1026  | <i>YRA1 shuffle</i>                         | <i>MATa ade2 leu2 trp1 ura3 Δyra1::HIS3+ &lt;YCplac33 URA3 YRA1&gt;</i>                                                                                                | (Zenklusen et al. 2001) |
| FSY1188  | <i>HA-YRA1 WT shuffled</i>                  | <i>MATa ade2 leu2 trp1 ura3 Δyra1::HIS3+ &lt;YCplac22 TRP1 HA-YRA1 WT &gt;</i>                                                                                         | This study              |
| FSY4976  | <i>WT (W303)</i>                            | <i>MATa ade2 leu2 his3 trp1 ura3</i>                                                                                                                                   | EUROSCARF               |
| FSY4726  | <i>Δslx8 YRA1 shuffle</i>                   | <i>MATa ade2 leu2 trp1 ura3 Δyra1::HIS3+ &lt;YCplac33 URA3 YRA1&gt;, Δslx8::LEU2</i>                                                                                   | This study              |
| FSY4917  | <i>Δslx5 YRA1 shuffle</i>                   | <i>MATa ade2 leu2 trp1 ura3 Δyra1::HIS3+ &lt;YCplac33 URA3 YRA1&gt;, Δslx5::KANr</i>                                                                                   | This study              |
| FSY4934  | <i>Δslx5, Δslx8 YRA1 shuffle</i>            | <i>MATa ade2 leu2 trp1 ura3 Δyra1::HIS3+ &lt;YCplac33 URA3 YRA1&gt;, Δslx5::KANr, Δslx8::LEU2</i>                                                                      | This study              |
| FSY4935  | <i>Δtom1, Δslx5 YRA1 shuffle</i>            | <i>MATa ade2 leu2 trp1 ura3 Δyra1::HIS3+ &lt;YCplac33 URA3 YRA1&gt;, Δtom1::KANr, Δslx5::KANr</i>                                                                      | This study              |
| FSY4936  | <i>Δtom1, Δslx8 YRA1 shuffle</i>            | <i>MATa ade2 leu2 trp1 ura3 Δyra1::HIS3+ &lt;YCplac33 URA3 YRA1&gt;, Δtom1::KANr, Δslx8::LEU2</i>                                                                      | This study              |
| FSY3373  | <i>Δtom1 YRA1 shuffle</i>                   | <i>MATa ade2 leu2 trp1 ura3 Δyra1::HIS3+ &lt;YCplac33 URA3 YRA1&gt;, Δtom1::KANr</i>                                                                                   | (Iglesias et al. 2010)  |
| FSY3412  | <i>Δtom1 HA YRA1 WT shuffled</i>            | <i>MATa ade2 leu2 trp1 ura3 Δyra1::HIS3+ &lt;YCplac22 TRP1 HA-YRA1WT&gt;, Δtom1::KANr</i>                                                                              | This study              |
| FSY4753  | <i>Δslx8 HA YRA1 WT shuffled</i>            | <i>MATa ade2 leu2 trp1 ura3 Δyra1::HIS3+ &lt;YCplac22 TRP1 HA-YRA1WT&gt;, Δslx8::LEU2</i>                                                                              | This study              |
| FSY4937  | <i>Δslx5 HA YRA1 WT shuffled</i>            | <i>MATa ade2 leu2 trp1 ura3 Δyra1::HIS3+ &lt;YCplac22 TRP1 HA-YRA1WT&gt;, Δslx5::KANr</i>                                                                              | This study              |
| FSY4938  | <i>Δslx5, Δslx8 HA YRA1 WT shuffled</i>     | <i>MATa ade2 leu2 trp1 ura3 Δyra1::HIS3+ &lt;YCplac22 TRP1 HA-YRA1WT&gt;, Δslx5::KANr, Δslx8::LEU2</i>                                                                 | This study              |
| FSY4939  | <i>Δtom1, Δslx5 HA YRA1 WT shuffled</i>     | <i>MATa ade2 leu2 trp1 ura3 Δyra1::HIS3+ &lt;YCplac22 TRP1 HA-YRA1WT&gt;, Δtom1::KANr, Δslx5::KANr</i>                                                                 | This study              |
| FSY4941  | <i>Δtom1, Δslx8 HA YRA1 WT shuffled</i>     | <i>MATa ade2 leu2 trp1 ura3 Δyra1::HIS3+ &lt;YCplac22 TRP1 HA-YRA1WT&gt;, Δtom1::KANr, Δslx8::LEU2</i>                                                                 | This study              |
| FSY50410 | <i>Δsiz1 (YV1168)</i>                       | <i>MATa ade2 leu2 trp1 ura3 his3 RAD5 can1 Δsiz1::KANr</i>                                                                                                             | B. Palancade            |
| FSY5051  | <i>Δsiz2 (YV1169)</i>                       | <i>MATa ade2 leu2 trp1 ura3 his3 RAD5 can1 Δsiz2::KANr</i>                                                                                                             | B. Palancade            |
| FSY5052  | <i>Δsiz1, Δsiz2 (YV1077)</i>                | <i>MATa ade2 leu2 trp1 ura3 his3 RAD5 can1 Δsiz1::KANr, Δsiz2::KANr</i>                                                                                                | B. Palancade            |
| FSY5053  | <i>mms21-11 (YV1084)</i>                    | <i>MATa ade2 leu2 trp1 ura3 his3 RAD5 can1 mms21-11::KANr</i>                                                                                                          | B. Palancade            |
| FSY3992  | <i>ulp1 ts</i>                              | <i>MATa ade2 leu2 trp1 ura3 Δulp1::HIS3+ &lt;YCplac22 TRP1 ulp1-ts&gt;</i>                                                                                             | This study              |
| FSY7017  | <i>HA-YRA1 WT integrated</i>                | <i>MATa ade2 leu2 his3 trp1 ura3 HA-YRA1WT::HIS5</i>                                                                                                                   | This study              |
| FSY7019  | <i>HA-yra1(1-210) integrated</i>            | <i>MATa ade2 leu2 his3 trp1 ura3 HA-yra1(1-210)::HIS5</i>                                                                                                              | This study              |
| FSY7022  | <i>HA-yra1allKR integrated</i>              | <i>MATa ade2 leu2 his3 trp1 ura3 HA-yra1Δintron::HIS5</i>                                                                                                              | This study              |
| FSY7158  | <i>Δrad52, HA-YRA1 WT integrated</i>        | <i>MATa ade2 leu2 his3 trp1 HA-YRA1WT::HIS5, Δrad52::NATr</i>                                                                                                          | This study              |
| FSY1982  | <i>mex67-5</i>                              | <i>MATa ade2 his3 leu2 trp1 ura3 mex67-5 integrated</i>                                                                                                                | (Jimeno et al. 2002)    |
| FSY5073  | <i>GA-6844</i>                              | <i>JKM179, MATa, Δhml::ADE1 hmr::ADE1 ade3::GALHO ade1-100 leu2-3, 112 lys5 trp1::hisG ura3-52CFP-NUP49 GFP-LacI:Leu2 MAT::LacO repeats:TRP1</i>                       | (Horigome et al. 2014)  |
| FSY6286  | <i>HA-YRA1 WT integrated in GA-6844</i>     | <i>JKM179, MATa, Δhml::ADE1 hmr::ADE1 ade3::GALHO ade1-100 leu2-3, 112 lys5 trp1::hisG ura3-52CFP-NUP49 GFP-LacI:Leu2 MAT::LacO repeats:TRP1, HA-YRA1WT::URA3</i>      | This study              |
| FSY6287  | <i>HA-yra1(1-120) integrated in GA-6844</i> | <i>JKM179, MATa, Δhml::ADE1 hmr::ADE1 ade3::GALHO ade1-100 leu2-3, 112 lys5 trp1::hisG ura3-52CFP-NUP49 GFP-LacI:Leu2 MAT::LacO repeats:TRP1, HA-yra1(1-120)::URA3</i> | This study              |
| FSY6288  | <i>HA-yra1allKR integrated in GA-6844</i>   | <i>JKM179, MATa, Δhml::ADE1 hmr::ADE1 ade3::GALHO ade1-100 leu2-3, 112 lys5 trp1::hisG ura3-52CFP-NUP49 GFP-LacI:Leu2 MAT::LacO repeats:TRP1, HA-yra1allKR::URA3</i>   | This study              |
| FSY6881  | <i>NA17</i>                                 | <i>MK225, MATa-inc, ade3::GALHO ade2-1 leu2-3, 112 his3-11, 15 trp1-1 can1-100, KanMX::HO-cs in URA3, KanMX::Clal in LYS2</i>                                          | (Agmon et al. 2013)     |

|                |                                          |                                                                                                                                             |            |
|----------------|------------------------------------------|---------------------------------------------------------------------------------------------------------------------------------------------|------------|
| <b>FSY7181</b> | <i>HA-YRA1 WT integrated in NA17</i>     | <i>MK225, MATa-inc, ade2-1 leu2-3, 112 his3-11, 15 trp1-1 can1-100, KanMX::HO-cs in URA3, KanMX::Clal in LYS2, HA-YRA1WT::HIS5</i>          | This study |
| <b>FSY7183</b> | <i>HA-yra1(1-120) integrated in NA17</i> | <i>MK225, MATa-inc, ade2-1 leu2-3, 112 his3-11, 15 trp1-1 can1-100, KanMX::HO-cs in URA3, KanMX::Clal in LYS2, HA-yra1(1-210)::HIS5</i>     | This study |
| <b>FSY7186</b> | <i>HA-yra1allKR integrated in NA17</i>   | <i>MK225, MATa-inc, ade2-1 leu2-3, 112 his3-11, 15 trp1-1 can1-100, KanMX::HO-cs in URA3, KanMX::Clal in LYS2, HA-yra1allKR::HIS5</i>       | This study |
| <b>FSY7738</b> | <i>Δrad52 integrated in NA17</i>         | <i>MK225, MATa-inc, ade3::GALHO ade2-1 leu2-3, 112 his3-11, 15 trp1-1 can1-100, KanMX::HO-cs in URA3, KanMX::Clal in LYS2, Δrad52::NATr</i> | This study |

## REFERENCES

- Agmon N, Liefshitz B, Zimmer C, Fabre E, Kupiec M. 2013. Effect of nuclear architecture on the efficiency of double-strand break repair. *Nat Cell Biol* **15**: 694-699.
- Horigome C, Oma Y, Konishi T, Schmid R, Marcomini I, Hauer MH, Dion V, Harata M, Gasser SM. 2014. SWR1 and INO80 chromatin remodelers contribute to DNA double-strand break perinuclear anchorage site choice. *Mol Cell* **55**: 626-639.
- Iglesias N, Tutucci E, Gwizdek C, Vinciguerra P, Von Dach E, Corbett AH, Dargemont C, Stutz F. 2010. Ubiquitin-mediated mRNP dynamics and surveillance prior to budding yeast mRNA export. *Genes Dev* **24**: 1927-1938.
- Jimeno S, Rondon AG, Luna R, Aguilera A. 2002. The yeast THO complex and mRNA export factors link RNA metabolism with transcription and genome instability. *EMBO J* **21**: 3526-3535.
- Zenklusen D, Vinciguerra P, Strahm Y, Stutz F. 2001. The yeast hnRNP-Like proteins Yra1p and Yra2p participate in mRNA export through interaction with Mex67p. *Mol Cell Biol* **21**: 4219-4232.

**S2 Table: Plasmids used in this study**

| Code     | Name                              | Description                                                                                                                                                 | Reference                       |
|----------|-----------------------------------|-------------------------------------------------------------------------------------------------------------------------------------------------------------|---------------------------------|
| pFS 3087 | pRS426 His6-UBI                   | Ubiquitin under CUP1 promoter (URA3, 2 $\mu$ )                                                                                                              | (Vitaliano-Prunier et al. 2008) |
| pFS 3571 | pRS426 empty                      | Empty vector (URA3, 2 $\mu$ )                                                                                                                               |                                 |
| pFS 3613 | pRS426 His6-SMT3                  | Sumo under CUP1 promoter (URA3, 2 $\mu$ )                                                                                                                   | B. Palancade                    |
| pFS 3688 | YCpLac111 LEU2 GAL1p HA-YRA1 WT   | YRA1 cloned as Sall fragment into pFS3647 (Gal1p HA-Sall-+500 YRA1)                                                                                         | This study                      |
| pFS 3687 | YCpLac22 TRP1 GAL1p HA-YRA1 WT    | YRA1 cloned as HindIII-SpeI from pFS3688 into pFS2233 (TRP1, CEN)                                                                                           | This study                      |
| pFS 1341 | YCpLac111 LEU2                    | Empty vector (LEU2, CEN)                                                                                                                                    |                                 |
| pFS 3932 | pUC18 URA3 HA-YRA1 WT             | pUC18 with SmaI fragment containing 500 bp YRA1 5' flanks, an ATG and HA-YRA1 WT followed by 500bp Yra1 3' flanks, URA3 marker and UTR-YDR381C sequence     | This study                      |
| pFS 3934 | pUC18 URA3 HA-yra1(1-210)         | pUC18 with SmaI fragment containing 500 bp YRA1 5' flanks, an ATG and HA-yra1(1-210) followed by 500bp Yra1 3' flanks, URA3 marker and UTR-YDR381C sequence | This study                      |
| pFS 3933 | pUC18 URA3 HA-yra1allKR           | pUC18 with SmaI fragment containing 500 bp YRA1 5' flanks, an ATG and HA-yra1allKR followed by 500bp Yra1 3' flanks, URA3 marker and UTR-YDR381C sequence   | This study                      |
| pFS 4131 | pRS415 pGAL1-HO LEU2              | HO endonuclease under GAL1 promoter                                                                                                                         | David Shore Lab                 |
| pFS 4082 | pUC18 HIS5 HA-YRA1 WT             | pUC18 with SmaI fragment containing 500 bp YRA1 5' flanks, an ATG and HA-YRA1 WT followed by 500bp Yra1 3' flanks, HIS5 marker and UTR-YDR381C sequence     | This study                      |
| pFS 4083 | pUC18 HIS5 HA-yra1(1-210)         | pUC18 with SmaI fragment containing 500 bp YRA1 5' flanks, an ATG and HA-yra1(1-210) followed by 500bp Yra1 3' flanks, HIS5 marker and UTR-YDR381C sequence | This study                      |
| pFS 4085 | pUC18 HIS5 HA-yra1 $\Delta$ allKR | pUC18 with SmaI fragment containing 500 bp YRA1 5' flanks, an ATG and HA-yra1allKR followed by 500bp Yra1 3' flanks, HIS5 marker and UTR-YDR381C sequence   | This study                      |
| pFS 3118 | pUG27 HIS5                        | Empty vector (HIS5)                                                                                                                                         |                                 |
| pFS 3574 | pUC18                             |                                                                                                                                                             |                                 |

## REFERENCES

Vitaliano-Prunier A, Menant A, Hobeika M, Geli V, Gwizdek C, Dargemont C. 2008. Ubiquitylation of the COMPASS component Swd2 links H2B ubiquitylation to H3K4 trimethylation. *Nat Cell Biol* **10**: 1365-1371.

**S3 Table: Primers used in this study**

| Code                  | SEQUENCE                                                                                  | Description                                                 | Reference                     |
|-----------------------|-------------------------------------------------------------------------------------------|-------------------------------------------------------------|-------------------------------|
| OFS 1840              | GGGGCGGCCAAGTAACAAACGAGTAAATTAATT<br>ACACCTTGTCagctgaagctctgtacgc                         | SLX8 deletion Fwd                                           | <i>This study</i>             |
| OFS 1841              | CCCGGCTACTCCATAGAATCTCTTTTGAGTAT<br>GCCTGTAAAACGgcataggccactagtgatctg                     | SLX8 deletion Rev                                           | <i>This study</i>             |
| OFS 1869              | TTATTATTTGGAACGCGGAGCTCCTCTAATAGT<br>CGAAATAATAGAcggatccccgggtaattaa                      | SLX5 deletion Fwd                                           | <i>This study</i>             |
| OFS 1870              | TGATGATAAGTTTCGAAAATGCCCTTATAAAAATT<br>AAACCGCGTGgaattcgagctgtttaaac                      | SLX5 deletion Rev                                           | <i>This study</i>             |
| OFS 2670<br>(SG-1879) | TTGCCCACTTCTAAGCTGATTTTC                                                                  | 0.6 Kb from HO site in<br>Mata Fwd                          | <i>(Horigome et al. 2014)</i> |
| OFS 2671<br>(SG-1880) | GTACTTTTCTACATTGGGAAGCAATAAA                                                              | 0.6 Kb from HO site in<br>Mata Rev                          | <i>(Horigome et al. 2014)</i> |
| OFS 2672<br>(SG-573)  | GTTCTCATGCTGTCGAGGATTTT                                                                   | 1.6 Kb from HO site in<br>Mata Fwd                          | <i>(Horigome et al. 2014)</i> |
| OFS 2673<br>(SG-574)  | AGACGTCCTTCTACAACAATTCATAAGT                                                              | 1.6 Kb from HO site in<br>Mata Rev                          | <i>(Horigome et al. 2014)</i> |
| OFS 2674<br>(SG-1883) | AACTGGCAAAGGTCTATGTAAAGATTTA                                                              | 4.5 Kb from HO site in<br>Mata Fwd                          | <i>(Horigome et al. 2014)</i> |
| OFS 2675<br>(SG-1884) | AATGGATGAAGATGATGACGTTGAC                                                                 | 4.5 Kb from HO site in<br>Mata Rev                          | <i>(Horigome et al. 2014)</i> |
| OFS 2676<br>(SG-1885) | CGTGGTTATGTATTGGTACTATTTCTTG                                                              | 9.6 Kb from HO site in<br>Mata Fwd                          | <i>(Horigome et al. 2014)</i> |
| OFS 2677<br>(SG-1886) | AATTGGATAATTTGAAATCTGGTAACCC                                                              | 9.6 Kb from HO site in<br>Mata Rev                          | <i>(Horigome et al. 2014)</i> |
| OFS 2678<br>(SG-1887) | TCTTAACGTGAACGGCAGTGA                                                                     | 23 Kb from HO site in<br>Mata Fwd                           | <i>(Horigome et al. 2014)</i> |
| OFS 2679<br>(SG-1888) | TGAATCTTCTCCATACGCTGCTAT                                                                  | 23 Kb from HO site in<br>Mata Rev                           | <i>(Horigome et al. 2014)</i> |
| OFS 2682<br>(SG-2285) | AATATGGGACTACTTCGCGCAACA                                                                  | HO cut efficiency Fwd                                       | <i>(Horigome et al. 2014)</i> |
| OFS 2683<br>(SG-2286) | CGTCACCACGTACTTCAGCATAA                                                                   | HO cut efficiency Rev                                       | <i>(Horigome et al. 2014)</i> |
| OFS 2798              | TAGTGCATATTTAGTTTACTTTTTGCCTTTGATT<br>GAAAATATATATTCcggatccccgggtaattaa                   | TOM1 deletion Fwd                                           | <i>This study</i>             |
| OFS 2799              | CGTTCTAAAATACTTGGTTACATGGCGTATAA<br>ATTTACACGAAAATGACGATGAATTCGAGCTC<br>GTTT              | TOM1 deletion Rev                                           | <i>This study</i>             |
| OFS 2790              | aggctgactctagaggatccccgggTACCACTACCACAGA<br>GTTCTTTG                                      | Fwd fragment 1 Gibson<br>assembly pUC18-Smal<br>(-314) YRA1 | <i>This study</i>             |
| OFS 2791              | <b>GCAGCGTACGAAGCT</b> CGTCACCGATGAGTAGG<br>TTA                                           | Rev fragment 1 Gibson<br>assembly (+183)<br>YRA1-pUG        | <i>This study</i>             |
| OFS 2792              | TAACCTACTCATCGGTGACGagctctgacgctgc                                                        | Fwd fragment 2 Gibson<br>assembly 3' YRA1-<br>pUG           | <i>This study</i>             |
| OFS 2793              | GTCAAATATGCCGAATAAACcattagggcactagtgatc<br>tg                                             | Rev fragment 2 Gibson<br>assembly pUG-3' YRA1               | <i>This study</i>             |
| OFS 2794              | <b>CAGATCCACTAGTGGCCTATG</b> TTTTATTTCGGC<br>ATATTTGAC                                    | Fwd fragment 3 Gibson<br>assembly pUG- 3'<br>YDR381         | <i>This study</i>             |
| OFS 2795              | acgaattcgagctcggtaccggggCATTCTTTGAGCCGT<br>ACT                                            | Rev fragment 3<br>Gibson assembly 5'<br>YDR381-Smal-pUC18   | <i>This study</i>             |
| OFS 2916              | GCAAACAAGGAGGTTGCCAAGAAGTCTGTAAG<br>GTTCTGGTGGCTTTGGTGTGTTGTCggatccccg<br>ggtaattaa       | RAD52 deletion Fwd                                          | <i>This study</i>             |
| OFS 2917              | AGGATTTTGGAGTAATAAATAATGATGCAAATTT<br>TTTATTTGTTTCGGCCAGGAAGCGTTTCGATGAA<br>TTCGAGCTCGTTT | RAD52 deletion Rev                                          | <i>This study</i>             |
| OFS 1717              | AACCGTCTTTCCTCCGTCGTAA                                                                    | SCR1 Fwd qPCR                                               | <i>This study</i>             |
| OFS 1718              | CTACCTTGCCGCACCAGACA                                                                      | SCR1 Rev qPCR                                               | <i>This study</i>             |
| OFS 4086              | CAGCCAGTTTAGTCTGACCA                                                                      | KAN IV Rev                                                  | <i>This study</i>             |

|                       |                               |                                                                 |                     |
|-----------------------|-------------------------------|-----------------------------------------------------------------|---------------------|
| <b>OFS 4088 (OI3)</b> | GTACGGTACCACTGAAACACAGCGTGCAG | Fwd on <i>LYS2</i> LOCUS used with OFS4086 to check KanMX::ClaI | (Agmon et al. 2013) |
| <b>OFS 4090 (OI9)</b> | TTTTGCGAGGCATATTTATGGTGAAGG   | Fwd on <i>URA3</i> LOCUS used with OFS4086 to check KanMX::HO   | (Agmon et al. 2013) |
| <b>OFS 4188</b>       | GAATTCAGCTTTCCGCAA            | HO site in NA17 background Fwd qPCR                             | <i>This study</i>   |
| <b>OFS 4179/A</b>     | GGTATTCTGGGCCTCCATGT          | HO site in NA17 background Rev qPCR                             | <i>This study</i>   |
| <b>OFS 3118</b>       | GCACTCTCATTCAATGTCC           | Fwd -600 <i>YRA1</i>                                            | <i>This study</i>   |
| <b>OFS 3120</b>       | GTAGTCTGGGACGTCGTATG          | Rev HA tag                                                      | <i>This study</i>   |

## REFERENCES

- Agmon N, Liefshitz B, Zimmer C, Fabre E, Kupiec M. 2013. Effect of nuclear architecture on the efficiency of double-strand break repair. *Nat Cell Biol* **15**: 694-699.
- Horigome C, Oma Y, Konishi T, Schmid R, Marcomini I, Hauer MH, Dion V, Harata M, Gasser SM. 2014. SWR1 and INO80 chromatin remodelers contribute to DNA double-strand break perinuclear anchorage site choice. *Mol Cell* **55**: 626-639.
